# Genetic and functional odorant receptor variation in the Homo lineage

Claire A. de March <sup>1,\*</sup>, Hiroaki Matsunami <sup>1,2</sup> Masashi Abe <sup>1,3</sup>, Matthew Cobb <sup>4</sup>, Kara C. Hoover <sup>5,\*</sup>

<sup>1</sup> Department of Molecular Genetics and Microbiology, Duke University Medical Center, Durham, NC 27710, USA

<sup>2</sup> Department of Neurobiology, Duke Institute for Brain Sciences, Duke University, Durham, NC 27710, USA

<sup>3</sup> Department of Biotechnology and Life Science, Tokyo University of Agriculture and Technology, Tokyo 184-8588, Japan

<sup>4</sup> Faculty of Life Sciences, The University of Manchester, Oxford Road, Manchester, M13 9PL, USA

<sup>5</sup> Department of Anthropology, University of Alaska Fairbanks, Fairbanks Alaska, 99775, USA

\* equal contribution / correspondence

## Abstract

**The largest and rapidly evolving gene family of odorant receptors detect odors to variable degrees due to amino acid sequence and protein structure. Hybridization between humans, Neandertals, and Denisovans implies shared behavior<sup>1,2</sup>, although some speculate that Neandertals were poor smellers<sup>3,4</sup>. We identified genetic and functional variation in humans and extinct lineages in 30 receptors with known function. We show that structural changes in receptor proteins altered odor sensitivity not specificity, indicating a common repertoire across**

**lineages. In humans, variation in receptors may change odor perception or induce odor-specific anosmia<sup>5,6</sup>. Variation in sensitivity may reflect local adaptations (e.g., Denisovan sensitivity to honey, Neandertals sensitivity to grass and sulphur). Extinct human lineages had highly conserved receptor genes and proteins. We observe a similar pattern in the Neandertal OR5P3 variant, which produced no response to ~350 odors. Our data suggest that receptor structure was highly conserved in our closest relatives, but not in living humans. The diversity of geographic adaptations in humans may have produced greater functional variation, increasing our olfactory repertoire and expanding our adaptive capacity<sup>5</sup>. Our results provide insight into odorant receptor function and shed light on the olfactory ecology of ancient humans and their extinct relatives. By studying the function of ancient odorant receptor genes, we have been able to get a glimpse of the sensory world of our extinct ancestors and relatives, with some of the variants giving specific insights into potential adaptations shown by these long-dead populations. The functional variability we have identified in the molecular structure of the odorant receptor proteins will aid in the more general problem of understanding the function of odorant receptor proteins and the neurons they are carried by, opening the road to linking receptor function to perception.**

## **Main**

Terrestrial animals smell by binding odorant molecules to odorant receptors (ORs).

Variation in mammalian ORs is linked to dietary niche, habitat, and sociability<sup>7</sup>.

Mammalian olfactory sensory neurons are biased towards food odors<sup>8</sup> and humans have undergone major evolutionary dietary shifts associated with changes in OR function (e.g. scavenging and hunting, animal milk consumption, cooking, domesticated grains)<sup>7,9-13</sup>. High allelic diversity in human ORs has increased the effective range of detectable odors (olfactory repertoire)<sup>5</sup>. Most human ORs respond to multiple odorants but there is limited knowledge of odorant-OR and genotype-phenotype associations.

The genus *Homo* is unique among primates in its migration and adaption to diverse global environments<sup>1</sup>. Denisovans and Neandertals ancestors dispersed from Africa earlier than humans<sup>2</sup> (~750,000 versus 65,000 years ago) and separated from each other ~300,000 years ago<sup>14</sup> (Extended Data Fig. 1). Neandertals were geographically wide-ranging (western Europe, Middle East, Asia) while Denisovans were geographically constrained to Siberia<sup>3,15</sup>, the Tibetan plateau<sup>16</sup>, and possibly beyond Wallace's Line<sup>17</sup>. Olfactory stimuli from divergent environments following independent dispersals from Africa may have left traces of variation in *Homo* ORs. Using published ancient DNA sequences to analyze genetic variation for population structure and test functional differences in gene variants for ecological differentiation, we address the question of whether there is a shared *Homo* olfactory repertoire.

We previously explored genetic and functional variation in humans, Altai Neandertal, and Denisovan for OR7D4<sup>18</sup>. We extended our study to 29 additional open reading frames (Supplemental Information Table 1) for ORs with known human receptor-odor<sup>6,19</sup> and two additional Neandertals (Chagyrskaya, Vindija) and one ancient human

(Ust'-Ishim) who lived in the same Altai montane locality (full sample in Extended Data Fig. 2). We used 1000 Genomes for living humans (Extended Data Fig. 3)<sup>3</sup>. We found that novel variants alter sensitivity but not specificity of OR function and conclude that the olfactory repertoires of extinct lineages were highly overlapping.

## Results

**Genetic variation.** Extinct lineages and Ust'-Ishim had fewer DNA variants than 1000 Genomes (Extended Data Fig. 4). Extinct lineages had smaller effective population sizes and lived in small, isolated communities prone to allele fixation through genetic drift<sup>20</sup>. Several variants were shared among samples (Supplemental Information Table 2), suggesting these variants occurred prior to global divergence of *Homo* (e.g., 6P1, 4Q3, 10G4, and 10G7 in Fig. 1).

The fixation index ( $F_{st}$ ) measures genetic variance due to population structure (typically weighted by population size) and ranges from 0 (no differentiation) to 1 (complete differentiation)<sup>21</sup>. 1000 Genomes fixation is lower than other large bodied mammals with wide geographic dispersal (Extended Data Fig. 5)<sup>22</sup>. OR5P3 fixation was the highest at 11.4%, the lower limit of possible significant differentiation by population structure. Comparing 1000 Genomes to extinct lineages,  $F_{st}$  values greater than 20% were observed in 1C1, 5AN1, 7C1, 10G3, 10J5, 51E1, 51E2, indicating past populations were more highly structured than today or that population structure differentiation may be an artifact of the greater variation in 1000 Genomes for these ORs. The remaining  $F_{st}$  values were <1%, indicating either panmixia or fixation due to

small group size, but may also these ORs having less variation compared to 1000 genomes or sharing more variants across populations than the high Fst ORs.

A total of 63 DNA variants were observed across 30 OR genes in extinct lineages but 78% of these were shared with 1000 Genomes (Supplemental Information Table 2). Variants observed only in ancient samples made up 22% (n=14) of the total observed variation (Extended Data Fig. 6). Denisovan contained the most novel variants—nine compared to the Neandertal five. No novel variants were observed in the ancient human Ust'-Ishim. Ten out of the 14 novel variants were missense and distributed across eight genes.

Amino acid sequences for the ORs studied were used to form a cladogram (Extended Data Fig. 7). Extinct lineages formed a clade with Vindija Neandertal the most distinct, which was unexpected because genome-wide studies have indicated that Vindija is most genetically similar to Chagyrskaya Neandertal<sup>20</sup>. The extinct clade was closest to the ancient human Ust'-Ishim and then to East and South Asian humans—the latter groups harbor genetic signatures of introgression with Neandertals and Denisovans<sup>17</sup>.

**Functional Variation.** Because gene function is not reliably predictable for ORs from sequence data<sup>23,24</sup>, we directly measured the functional responses of two Neandertal and six Denisovan ORs containing novel variants. Each OR protein, expressed in a cell line, was screened against seven odorants previously identified in the literature as evoking responses: OR1A1<sup>23,25</sup>, OR1C1<sup>24</sup>, OR2C1<sup>23</sup>, OR10J5<sup>23</sup>, OR5P3<sup>23</sup>, and

OR10G3<sup>24</sup>. Dose response assays for the top screening responses included seven concentrations of the odors delivered separately.

There were only three Neandertal genes containing novel variants. Their dose responses were not correlated with those of humans (Figs. 2a, 2c, 2d). Only 1C1 had a detectable response but significantly lower than that of humans (Figs. 3a, 3c, 3d, 4, S2, S3). Despite the higher number of novel OR variants in the Denisovans and higher dose responses compared to humans (Fig. 2c, 2d), these OR responses and those for human reference were significantly correlated ( $R^2 = 0.87$ ) (Fig. 2b). Tested Denisovan ORs were less sensitive to odors we perceive as floral but much more sensitive to odors we perceive as spicy, balsamic, or unpleasant (e.g., sulfur 4x greater than in humans and three times greater for balsamic) (Table 1). Higher dose responses in Denisovan ORs appear to be driven by two amino acid variations in two of the ORs with novel variants (Fig. 3, Extended Data Fig. 8).

Despite using the same DNA sequence as previous studies of 2B11<sup>24</sup> and 6P1<sup>6</sup>, the human reference for both of these did not respond to any of the ~350 odors (100μM) against which they were tested (Extended Data Fig. 9)—neither did the extinct lineages. In previous studies, OR2B11<sup>24</sup> and OR6P1<sup>6</sup> responded strongly to coumarin and anisaldehyde, respectively, at concentrations higher than 100μM. We found that such concentrations often cause cell toxicity or OR non-specific cell responses.

*OR1A1*. All but 2-heptanone induced a response in the screening assay (Extended Data Fig. 8a) and the highest responses were for honey (particularly for the Denisovan) (Table 1, Fig. 3). Fst between 1000 Genomes and extinct lineages for this gene was low (7%), suggesting some difference due to population structure (1000 Genomes Fst = 3.4%) (Extended Data Fig. 5). Neither of the two Denisovan variants (V461I<sup>1.54</sup>, T257M<sup>6.54</sup>) were in an amino acid region critical for mammalian OR function nor were they involved in the odorant binding cavity—perhaps explaining their minimal functional impact.

*OR1C1*. The only significant response was from Chagyrskaya Neandertal to androstadienone (Extended Data Fig. 8b) and it was weak (Table 1; Fig. 3). Fst between 1000 Genomes and extinct lineages for 1C1 was high (38%) (1000 Genomes Fst = 9%), suggesting some structure in human groups across evolutionary time (Extended Data Fig. 5). Chagyrskaya Neandertal 1C1 variant Y120H<sup>3.48</sup> is part of the highly conserved MAY<sup>3.48</sup>DRY motif involved in the activation of mammalian ORs (Fig. 3, Extended Data Fig. 8b), which might explain why this variant alters function.

*OR2C1*. Screening assay responses were strong but not statistically significant (Extended Data Fig. 8a). The dose response assay for octanethiol produced a statistically significant response in the Denisovan version of this OR (Table 1, Fig. 3). Fst between 1000 Genomes and extinct lineages for this gene was 13.3% compared to that within 1000 Genomes (1.5%), suggesting that human populations are not highly differentiated by this gene today but were to a greater degree in the past (Extended

Data Fig. 5). The shared C149W<sup>4.50</sup> corresponds to the conserved W<sup>4.50</sup>. The W residue is highly conserved in GPCRs but less so in ORs (58%). The location of the novel Denisovan I214T<sup>5.54</sup> in TM5 is below residues involved in canonical ligand binding cavity and it points into the receptor rather than the surface. In addition, prior functional tests for C149 found a similar response<sup>6</sup>. The C149W allele may stop protein function and may have produced octanethiol-specific anosmia.

*OR5P3*. In the screening assay, Vindija Neandertal did not have a significant response but the human reference responded to five of the seven odorants (Extended Data Fig. 8b). Vindija dose responses, which included higher concentrations of the top three responses for humans (courmarin and both enantiomers of carvone), did not exceed control (Fig. 3). The cell surface expression for Vindija indicated that the OR proteins was present at the cell surface, albeit at a slightly lower level than that in humans. *Fst* between 1000 Genomes groups and extinct lineages (15%) is similar to 1000 Genomes *Fst* (11.4%) and suggests that 5P3 may be influenced by population structure across evolutionary time (Extended Data Fig. 5). Vindija F159L<sup>4.58</sup> is in the extracellular part of TM4 (Fig. 3), near 4.53, which is involved in mouse OR trafficking<sup>26</sup>. We observed slightly lower trafficking of the Vindija protein. A similar mutation (S155A<sup>4.56</sup>) in human OR1A2 decreases *in vitro* responses to (S)-(-)-citronellal<sup>25</sup>. If OR5P3 F159L<sup>4.58</sup> is involved in odorant binding, the mutation of this position from phenylalanine to leucine might prevent the  $\pi$ - $\pi$  stacking interaction between the aromatic residue and coumarin. We conclude that the Vindija protein is not functional and this might be attributable to



many potential reasons (a few examples are lack of odorant binding, or fail in activation mechanism, or fail to bind the G protein).

*OR10G3*. The screening assay revealed significant responses for all seven odors in the Denisovan OR and in the human reference (Extended Data Fig. 8a). Denisovan variants had significantly stronger dose responses to vanillin and ethyl vanillin compared to humans (Table 1; Fig. 3). Fst was higher between us and extinct lineages (19.5%) compared to within 1000 Genomes (2.4%), suggesting that populations are much less differentiated by this gene today than in the past (Extended Data Fig. 5). Neither of the Denisovan variants ( S73G<sup>2.52</sup>, E197K<sup>5.36</sup>) were located in conserved amino acid regions (Fig. 3). TM2 is not involved in odorant binding or receptor function, implying that S73G<sup>2.52</sup> probably did not change the receptor response. TM5 (E197K<sup>5.36</sup>) forms part of the binding cavity but position 5.36 is located at the very limit of ECL2. K at this position is a rare residue in present-day human ORs (3.6%), suggesting a functional, adaptative reason for this change. The location of the variant suggests it may be involved in ligand entry.

*OR10J5*. There were three significant screening responses to lyral and helional and eugenol (Extended Data Fig. 8a). The Denisovan response to top odor lyral was lower than that of the human reference (Table 1, Fig. 3). Fst between 1000 Genomes and extinct lineages was 25% (1000 Genomes, 6.8%), again suggesting that the strong differentiation among humans in evolutionary history is much reduced today (Extended Data Fig. 5). The G21R<sup>Nter</sup> variant of 10J5 found in the Denisovan is located at the very

end of the N terminal end, just before the start of TM1. The role of this region in OR function is undetermined.

## Discussion

Ten novel missense variants were located in 8 genes (out of 30), with five being functionally different from humans (1C1, 2C1, 5P3, 10G3, 10J5), one the same (1A1) and two without identifiable ligands (2B11, 6P1). Given the small percentage of genes with variants altering OR function, members of the genus *Homo* likely shared an olfactory repertoire, with Neandertals and Denisovans smelling the same range of odors we do but having different dose responses to those odors. When OR function was altered by a novel OR, the difference was in sensitivity rather than specificity. Novel Denisovan OR variants (1A1, 2C1, 10G3, 10J5) were twice as responsive as human equivalents to odors humans perceive as spicy, balsamic, and unpleasant (Table 1), but not to odors perceived as floral. Novel Neandertal variants were three times less responsive than human ORs, including reduced responses to odors perceived as green, floral, and spicy (Table 1). There is some correlation in Neandertal skull morphology that suggests their olfactory bulbs were smaller than humans<sup>3</sup>, but the link between bulb size and olfactory acuity is unclear<sup>27,28</sup>.

The Denisovan ORs strong response to honey may be ecologically significant. Honey is the most energy-dense natural food and is a prized component of living hunter-gatherer diets (except where bees are rare or absent)—even great apes have a ‘honey tooth’<sup>29</sup>. Energy-dense foods like sugars are sought by larger-brained primates<sup>30</sup> and, based on

oral microbiome data, Neandertals and humans share functional adaptations in nutrient metabolism including starch digestion that are not found in our closest ape relatives<sup>31</sup>. The high response to vanilla odors suggests a potential response to sweet things—an odor-taste pairing common in humans<sup>32</sup>.

Local ecological adaptive pressures may have acted on ORs in extinct lineages to produce the few novel variants observed, but extinct lineages were less variable in OR genes and proteins compared to 1000 Genomes. While differences in sample sizes might account for some of the striking differences, the reduced variation is probably due to genetic drift effect or conservation. Small effective population sizes cause bottlenecks and small, isolated populations<sup>20</sup> are prone to allele fixation through genetic drift. Purifying selection has been observed in chimpanzee ORs compared to a mix of relaxed and positive selection in human ORs<sup>33</sup> and extinct lineages may also have been subject to this, as evidenced by fewer variants that mostly code for synonymous proteins (compared to protein variation in 1000 Genomes). The mean of *Fst* values across genes comparing 1000 Genomes to extinct lineages (11%) is higher than those for 1000 Genomes population comparisons (4%), which suggests that there are structural differences between them and us that reflect both explanations—drift and conservation. Based on our data the last common ancestor shared by *Homo* (humans, Neandertals, Denisova, and others) and *Pan* (chimpanzees, bonobos) had a conserved set of ORs. Humans derived away from the pattern of conservation more recently, with evolutionary pressure toward increased missense variation.

Despite having a shared repertoire with Neandertals and Denisovans, humans are novel in their highly variable OR repertoire which may reflect cultural adaptations following migrations from Africa. Relaxed selection on OR genes for groups no longer engaging in traditional lifestyles is possible <sup>34</sup>. 1000 Genomes groups outside Africa are less variable in most OR genes than those in Africa and OR gene enrichment is observed in African hunter-gatherer groups (Hadza and Pygmies) but not African agricultural (Yoruba) and pastoral (Maasai) groups <sup>35</sup>. Tanzanian Sandawe hunter-gatherers show no OR allelic enrichment, however, which undermines the case for relaxed selection <sup>35</sup>. High allelic diversity and OR generalization on a broad scale may have functional implications, such as increasing the effective size of the olfactory repertoire <sup>5</sup>. Understanding our unique OR allelic diversity is an important challenge.

Our data provide insights into how the dispersal of human lineages outside of Africa (Denisova, Neandertal, ancient human) may have affected olfactory gene repertoire and function. Understanding the evolutionary genetics and functional significance of observed OR allelic variability in and among human populations and extinct relatives sheds light on the role of olfaction in key aspects of human culture, and perhaps our current success as a global species.

**Table 1. Comparison of OR activity index for human and extinct lineages\***

| Gene   | Odorant              | Description                         | Note     | Denisovan                     | Human        |
|--------|----------------------|-------------------------------------|----------|-------------------------------|--------------|
| OR1A1  | (+)-carvone          | mint, herbal, spearmint             | green    | 10.29                         | 10.64        |
| OR1A1  | 1-heptanol           | musty, leaf, violet, herbal, green  | green    | 0.80                          | 0.89         |
| OR1A1  | allyl phenyl acetate | honey, fruity, rum                  | fruity   | 13.87                         | 13.12        |
| OR1A1  | beta-citronellol     | citronella, rose, leafy, oily petal | floral   | 9.03                          | 7.52         |
| OR1A1  | benzyl acetate       | floral, jasmin, fruity              | floral   | 2.38                          | 2.89         |
| OR1A1  | citral               | lemon, juicy, lemon peel            | fruity   | 2.66                          | 2.99         |
| OR2C1  | 1,3-propanthiol      | meaty, sulfurous                    | sulfur   | 0.97                          | 0.71         |
| OR2C1  | 2- propanthiol       | cooked vegetable, mustard           | sulfur   | 1.02                          | 0.64         |
| OR2C1  | nonanthiol           | sulfurous                           | sulfur   | 1.45                          | 0.00         |
| OR2C1  | octanethiol          | sulfurous                           | sulfur   | 4.65                          | 0.94         |
| OR10G3 | ethyl vanillin       | vanilla, creamy, caramellic         | balsamic | 10.28                         | 3.57         |
| OR10G3 | eugenol              | clove, spicy, woody                 | spicy    | 1.90                          | 1.37         |
| OR10G3 | g-undecalactone      | peach, creamy, coconut              | fruity   | 1.56                          | 0.94         |
| OR10G3 | vanillin             | vanilla, creamy, chocolate          | balsamic | 8.98                          | 3.52         |
| OR10J5 | helional             | fresh green, watery, ozone          | green    | 1.80                          | 1.53         |
| OR10J5 | lyral                | floral, muguet                      | floral   | 4.33                          | 11.71        |
|        |                      |                                     |          | <b>Neandertal Chagyrskaya</b> | <b>Human</b> |
| OR1C1  | androstadienone      | urine, sweating                     | animal   | 3.73                          | 4.58         |
|        |                      |                                     |          | <b>Neandertal Vindija</b>     | <b>Human</b> |
| OR5P3  | (-)-carvone          | spicy, bready, caraway              | spicy    | 1.92                          | 15.41        |
| OR5P3  | (+)-carvone          | mint, herbal, spearmint             | green    | 1.09                          | 13.14        |
| OR5P3  | 1-heptanol           | musty, leaf, violet, herbal, green  | green    | 1.22                          | 1.32         |
| OR5P3  | 1-hexanol            | fusel, oily, fruity, green          | green    | 1.14                          | 1.73         |
| OR5P3  | acetophenone         | pungent, hawthorn, almond, mimosa   | floral   | 1.30                          | 1.80         |
| OR5P3  | coumarin             | hay, tonka                          | balsamic | 2.00                          | 26.41        |

\* Color coding is from low (purple) to high (mustard).

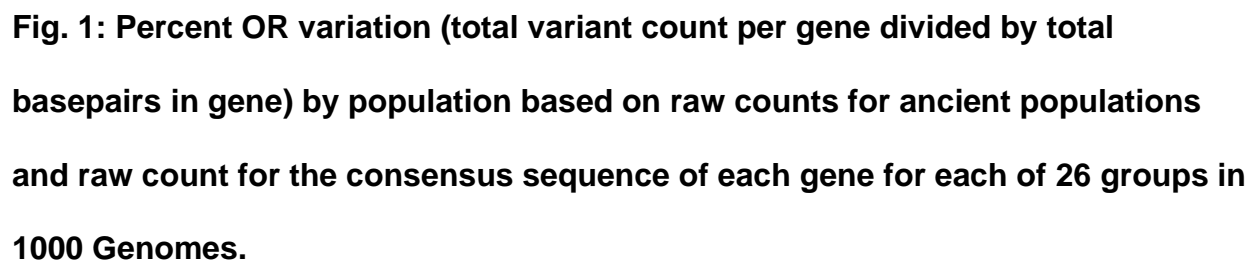

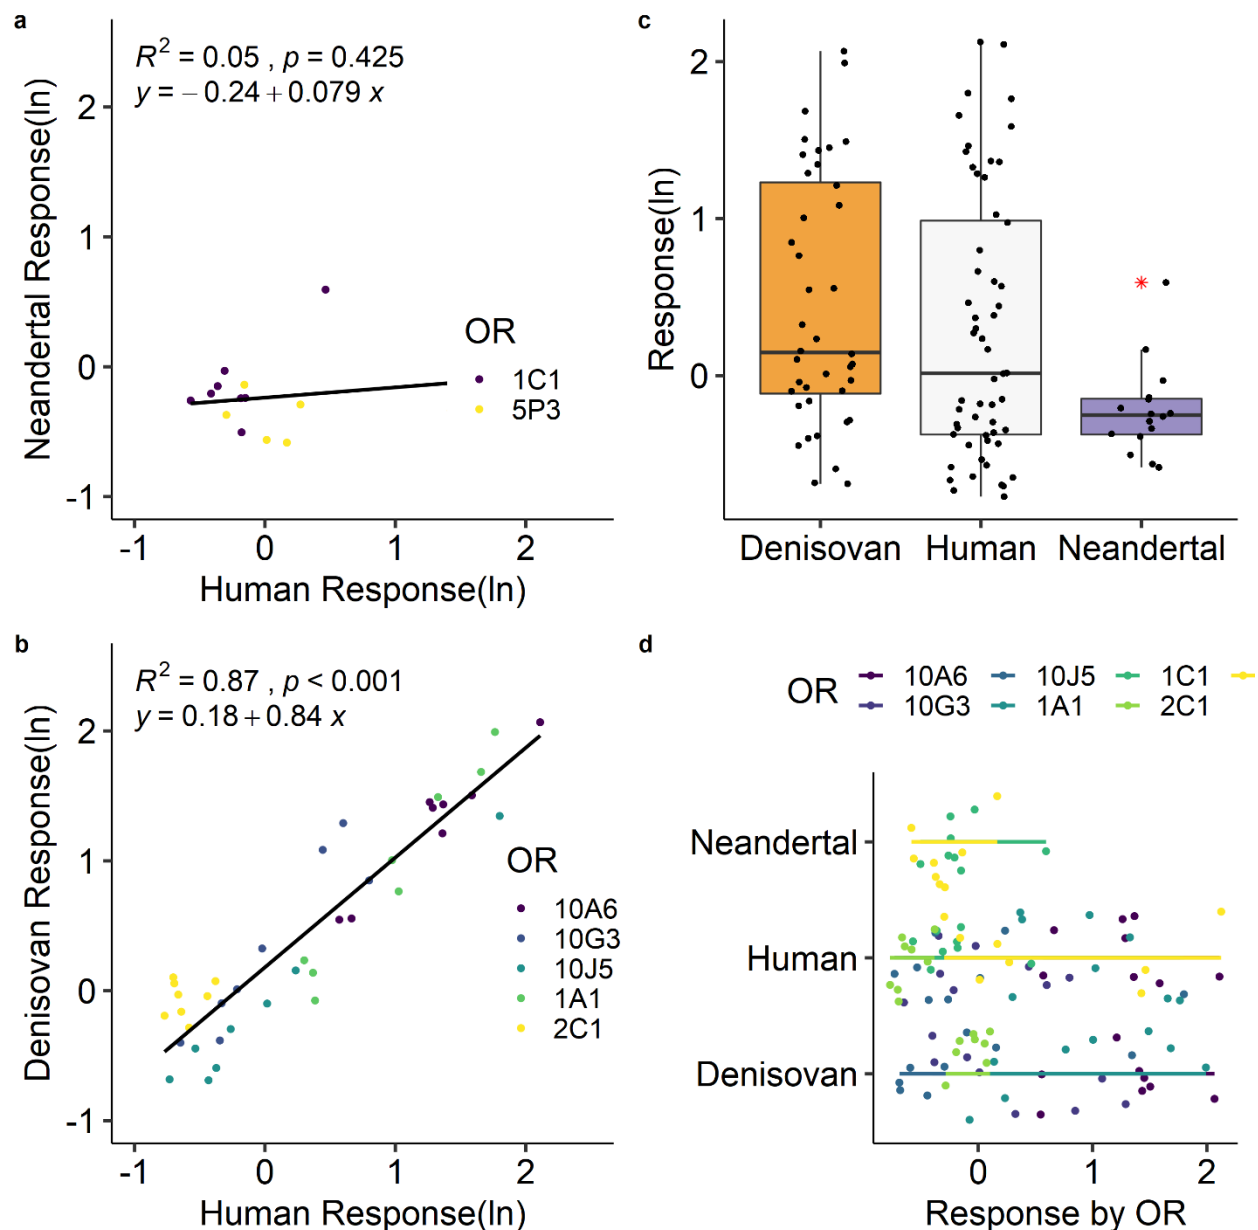

**Fig. 2: Regression results for dose responses. a) Human and Denisovan, b) Human and Neandertal, c) Boxplots of dose responses for all samples showing median, box boundaries (first and third quartiles), and two whiskers (upper whisker extends to the largest value no further than 1.5 inter-quartile range from third quartile; lower whisker extends to the smallest value at most 1.5 inter-**

quartile range of first quartile, outliers identified with red asterisk), d) Dose response (Activity) by OR for all three samples.

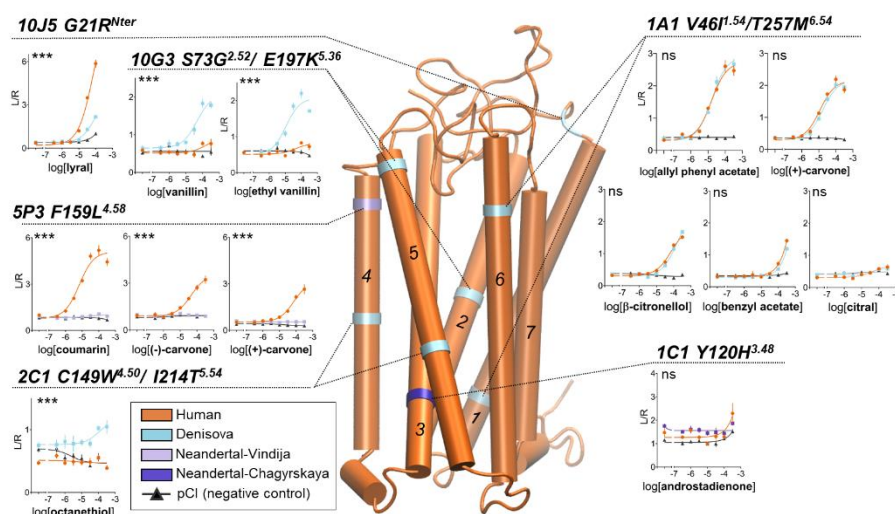

**Fig. 3: Homology model of the human consensus odorant receptor to illustrate location of variants. Panels show dose-response for odorants that were significantly activating ORs in screening. (SI Fig. 3; 10G3 and 2C1 both have one shared and one novel mutation). The x-axis of panels represents the odorant concentration (M) and the y-axis the normalized luminescence generated by the activated OR. Error bars are SEM (standard error of the mean).**

## References

- Varki, A., Geschwind, D. H. & Eichler, E. E. Human uniqueness: genome interactions with environment, behaviour and culture. *Nature Reviews Genetics* **9**, 749, doi:10.1038/nrg2428 (2008).
- Winder, I. C. *et al.* Evolution and dispersal of the genus *Homo*: A landscape approach. *J. Hum. Evol.* **87**, 48-65, doi:<http://dx.doi.org/10.1016/j.jhevol.2015.07.002> (2015).



- 3  
southern Siberia. *Nature* **565**, 594-599, doi:10.1038/s41586-018-0843-2 (2019).
- 4  
Hughes, G. M., Teeling, E. C. & Higgins, D. G. Loss of olfactory receptor function  
in hominin evolution. *PLoS One* **9**, e84714, doi:10.1371/journal.pone.0084714  
(2014).
- 5  
Trimmer, C. *et al.* Genetic variation across the human olfactory receptor  
repertoire alters odor perception. *Proceedings of the National Academy of  
Sciences*, 201804106, doi:10.1073/pnas.1804106115 (2019).
- 6  
Mainland, J. D. *et al.* The missense of smell: functional variability in the human  
odorant receptor repertoire. *Nat. Neurosci.* **17**, 114-120, doi:10.1038/nn.3598  
(2014).
- 7  
Hughes, G. M. *et al.* The birth and death of olfactory receptor gene families in  
mammalian niche adaptation. *Mol. Biol. Evol.*, msy028-msy028,  
doi:10.1093/molbev/msy028 (2018).
- 8  
Saraiva, L. R. *et al.* A transcriptomic atlas of mammalian olfactory mucosae  
reveals an evolutionary influence on food odor detection in humans. *Science  
Advances* **5**, eaax0396, doi:10.1126/sciadv.aax0396 (2019).
- 9  
Luca, F., Perry, G. H. & A., D. R. Evolutionary Adaptations to Dietary Changes.  
*Annu. Rev. Nutr.* **30**, 291-314, doi:10.1146/annurev-nutr-080508-141048 (2010).
- 10  
McRae, Jeremy F. *et al.* Identification of Regions Associated with Variation in  
Sensitivity to Food-Related Odors in the Human Genome. *Curr. Biol.* **23**, 1596-  
1600, doi:http://dx.doi.org/10.1016/j.cub.2013.07.031 (2013).
- 11  
Jaeger, S. R. *et al.* A Mendelian trait for olfactory sensitivity affects odor  
experience and food selection. *Curr. Biol.* **23**, 1601-1605,  
doi:10.1016/j.cub.2013.07.030 (2013).
- 12  
McRae, J. F. *et al.* Genetic Variation in the Odorant Receptor OR2J3 Is  
Associated with the Ability to Detect the “Grassy” Smelling Odor, cis-3-hexen-1-  
ol. *Chem. Senses* **37**, 585-593, doi:10.1093/chemse/bjs049 (2012).
- 13  
Lunde, K. *et al.* Genetic variation of an odorant receptor OR7D4 and sensory  
perception of cooked meat containing androstenone. *PLoS One* **7**, e35259  
(2012).
- 14  
Prufer, K. *et al.* The complete genome sequence of a Neanderthal from the Altai  
Mountains. *Nature* **505**, 43-49, doi:10.1038/nature12886 (2014).
- 15  
Zavala, E. I. *et al.* Pleistocene sediment DNA reveals hominin and faunal  
turnovers at Denisova Cave. *Nature*, doi:10.1038/s41586-021-03675-0 (2021).
- 16  
Chen, F. *et al.* A late Middle Pleistocene Denisovan mandible from the Tibetan  
Plateau. *Nature* **569**, 409-412, doi:10.1038/s41586-019-1139-x (2019).
- 17  
Jacobs, G. S. *et al.* Multiple Deeply Divergent Denisovan Ancestries in Papuans.  
*Cell* **177**, 1010-1021.e1032, doi:10.1016/j.cell.2019.02.035 (2019).
- 18  
Hoover, K. C. *et al.* Global survey of variation in a human olfactory receptor gene  
reveals signatures of non-neutral evolution. *Chem. Senses* **40**, 481-488,  
doi:10.1093/chemse/bjv030 (2015).
- 19  
Zhuang, H., Chien, M. & Matsunami, H. Dynamic functional evolution of an  
odorant receptor for sex-steroid-derived odors in primates. *Proceedings of the  
National Academy of Sciences* **106**, 21247 - 21251 (2009).

- 20 Mafessoni, F. *et al.* A high-coverage Neandertal genome from Chagyrskaya Cave. *Proceedings of the National Academy of Sciences* **117**, 15132-15136, doi:10.1073/pnas.2004944117 (2020).
- 21 Wright, S. The interpretation of population structure by f-statistics with special regard to systems of mating. *Evolution* **19**, 395-420, doi:https://doi.org/10.1111/j.1558-5646.1965.tb01731.x (1965).
- 22 Templeton, A. R. Human Races: A Genetic and Evolutionary Perspective. *American Anthropologist* **100**, 632-650 (1998).
- 23 Saito, H., Chi, Q., Zhuang, H., Matsunami, H. & Mainland, J. Odor coding by a Mammalian receptor repertoire. *Science Signaling* **2**, ra9 (2009).
- 24 Adipietro, K. A., Mainland, J. D. & Matsunami, H. Functional evolution of mammalian odorant receptors. *PLoS Genet.* **8**, e1002821, doi:10.1371/journal.pgen.1002821 (2012).
- 25 Schmiedeberg, K. *et al.* Structural determinants of odorant recognition by the human olfactory receptors OR1A1 and OR1A2. *J. Struct. Biol.* **159**, 400-412, doi:10.1016/j.jsb.2007.04.013 (2007).
- 26 Ikegami, K. *et al.* Structural instability and divergence from conserved residues underlie intracellular retention of mammalian odorant receptors. *Proceedings of the National Academy of Sciences* **117**, 2957-2967, doi:10.1073/pnas.1915520117 (2020).
- 27 Bastir, M. *et al.* Evolution of the base of the brain in highly encephalized human species. *Nature Communications* **2**, 588, doi:10.1038/ncomms1593 <http://www.nature.com/articles/ncomms1593#supplementary-information> (2011).
- 28 Weiss, T. *et al.* Human Olfaction without Apparent Olfactory Bulbs. *Neuron*, doi:10.1016/j.neuron.2019.10.006 (2019).
- 29 Marlowe, F. W. *et al.* Honey, Hadza, hunter-gatherers, and human evolution. *J. Hum. Evol.* **71**, 119-128, doi:https://doi.org/10.1016/j.jhevol.2014.03.006 (2014).
- 30 Dominy, N. J. Ferment in the family tree. *Proceedings of the National Academy of Sciences* **112**, 308-309, doi:10.1073/pnas.1421566112 (2015).
- 31 Fellows Yates, J. A. *et al.* The evolution and changing ecology of the African hominid oral microbiome. *Proceedings of the National Academy of Sciences* **118**, e2021655118, doi:10.1073/pnas.2021655118 (2021).
- 32 Wang, G., Hayes, J. E., Ziegler, G. R., Roberts, R. F. & Hopfer, H. Dose-Response Relationships for Vanilla Flavor and Sucrose in Skim Milk: Evidence of Synergy. *Beverages* **4**, 73 (2018).
- 33 Gilad, Y., Man, O. & Glusman, G. A comparison of the human and chimpanzee olfactory receptor gene repertoires. *Genome Res.* **15**, 224-230, doi:10.1101/gr.2846405 (2005).
- 34 Somel, M. *et al.* A scan for human-specific relaxation of negative selection reveals unexpected polymorphism in proteasome genes. *Mol. Biol. Evol.* **30**, 1808-1815, doi:10.1093/molbev/mst098 (2013).
- 35 Lachance, J. *et al.* Evolutionary history and adaptation from high-coverage whole-genome sequences of diverse African hunter-gatherers. *Cell* **150**, 457-469, doi:10.1016/j.cell.2012.07.009 (2012).



## Methods

**Samples.** We cataloged variants in high quality paleogenomic sequence data produced by the Max Planck Institute Leipzig (Extended Data Fig. 2) for Neandertals (Altai, Chagyrskaya, Mezmaiskaya), Denisovan 3 (the only high quality Denisovan genome, finger phalanx), and an ancient human hunter-gatherer from Siberia (Ust'-Ishim). We used the data generated by snpAD in /neandertal/vindija/vcf, an ancient DNA damage-aware genotyper.<sup>1</sup> The VCF reference genome for genomes analyzed was hg19/GRCh37. Only variants with a minimum genotype quality of 20 (GC20) were used for downstream analysis. Our sample of living humans was from the 1000 Genomes dataset <sup>36</sup> consisting of over 2,500 individuals from 26 populations in Africa, the Americas, Europe, and Asia (Extended Data Fig. 3).

Although the draft genomes of Neandertals and Denisovans were reported as having more nonfunctional ORs than humans <sup>4</sup>, these genomes have since been revised <sup>20,37</sup>. The bioinformatic identification of olfactory pseudogenes has been experimentally challenged <sup>38</sup> by data showing the receptors containing coding sequence regions split into separate exons are conserved across mammals and expressed at the same level as protein-coding receptors with a single exon <sup>39</sup>

**Target Genes.** We focused on 30 OR genes shown to generate functional response data in previous studies <sup>19</sup> (Supplemental Information Table 1). Gene regions were targeted using NCBI and RefSeq ranges—in the case of eight genes that contained up- and downstream sequences, the region was cut to the protein coding portion of the

gene to be consistent with the other 22 genes that contained no up- or downstream areas.

**Variant calling.** Max Planck and 1000 Genomes Project both used the reference genome, hg19/GRCh37, to call variants using VCFtools<sup>40</sup>. GRCh37 is built from sequences from different individuals and serves as the wild type relative. If the reference allele is C at a specific genomic position, a variant is called if it is not a C. We excluded insertions and deletions from analysis. BCFtools<sup>41</sup> was used to slice VCFs into chromosomes (ancient DNA) and genes of interest. For 1000 Genomes, BCF tools was also used to generate population specific VCF files. BCF tools was used to create consensus sequences for each gene for the entire 1000 Genomes dataset and for each populations.

We cataloged variants using two sets of VCF data published by Max Planck Institute for Evolutionary Anthropology Leipzig in 2013 and 2016. Both datasets are based on the same original sequence data but the 2016 VCFs were generated using snpAD, an ancient DNA damage-aware genotyper, and are more conservative estimates mutations<sup>37</sup>. The 2016 VCFs include high quality data from three Neandertals (Altai, Chagyrskaya, Vindija), lower quality data from one Neandertal (Mezmaiskaya), high quality from one Denisova (Denisovan 3), and one ancient human contemporary to Altai Neandertal and Denisova in Denisova Cave (Ust'-Ishim). Data are at <http://cdna.eva.mpg.de/neandertal/Vindija/VCF>. The 2013 VCF data analysis is found in Supplemental Information and included high quality data—but not subject to the

damage-aware genotyper—for Altai Neandertal, Denisova 3, and Ust'-Ishim. Data are found at <http://cdna.eva.mpg.de/ust-ishim/VCF> and <http://cdna.eva.mpg.de/neandertal/altai/AltaiNeandertal/>.

The 26 groups in 1000 Genomes were comprised of individuals with at least 3 out of 4 grandparents identifying membership in the group. While there are some groups engaging in pastoral or traditional horticulture/farming lifestyles, most practice mixed subsistence economies and lead western lifestyles.

**Novel variant calling.** R v4.1.0<sup>42</sup> via R Studio v1.4.1717<sup>43</sup> were used for analysis. Excel and csv files were read using readxl<sup>44</sup>. The hash function in R<sup>42,43</sup> used 1000 Genomes variant data<sup>36</sup> as a key to flag variants present in ancient samples but not found in present-day humans. Data were manipulated using dplyr<sup>45</sup> and tidyverse<sup>46</sup>.

**Genetic Analysis.** Variants were called using DNAsp to generate Nexus files for each gene comparing a consensus sequence for each of the 26 groups in 1000 Genomes to the human reference sequence used for the published datasets (Max Planck and 1000 Genomes). Consensus sequences were used for each group in 1000 Genomes to reduce the sample size for comparison to ancient sequences which represented individuals, not groups. Biostrings<sup>47</sup> was used in R to create protein sequence files and call amino acid substitutions. Figures for percentage of variation by gene were generated using the R package ggplot2 with the viridis color-blind friendly palette and plotted panels using gridExtra<sup>48</sup>. Concatenated amino acid sequences were used to

infer phylogenetic relationships across populations for 30 genes<sup>49</sup>. The phylogenetic tree was created using the R packages ape<sup>50</sup>, seqinr<sup>51</sup>, phylogram<sup>52</sup>, gdsfmt<sup>53</sup>, SNPrelate<sup>53</sup>, and dendextend<sup>54</sup>. Fst was calculated using gdsfmt<sup>53</sup> and SNPRelate<sup>53</sup>.

**Primer design.** ORs for extinct humans were created by mutating human ORs to match paleogenomic sequence data using chimeric PCR. Forward and reverse PCR primers containing the desired mutation were designed to have a 56°C or 58°C annealing temperature, obtained from Integrated DNA Technologies, and diluted to 5µM.

**Chimeric PCR.** Chimeric PCR was performed using Phusion polymerase and Rho-tagged OR in a pCI vector as a template, with separate reactions using the forward primers paired with a 3' pCI primer or reverse primers paired with a 5' pCI primer<sup>55</sup>. The reaction was started at 98°C for 30 seconds, then run for 25 cycles of the following conditions: denaturation at 98°C for 5 seconds, primer annealing at 55°C for 15 seconds, and elongation at 72°C for 30 seconds. The reaction was then held at 72°C for 5 minutes. The products resulting from the forward and reverse primers were combined for each mutant and diluted 10x with distilled water (Gibco). A second PCR was performed using Phusion polymerase, 5' and 3' pCI primers, and the combined and diluted products for each desired mutant as the template. The same PCR conditions were used. The products were purified using the QIAquick PCR Purification Kit (Qiagen), cut with MluI and NotI restriction enzymes, run on a 1.1% agarose gel with GelRed, and extracted using the QIAquick Gel Extraction Kit (Qiagen). The products were then ligated into Rho-tagged pCI cut with MluI and NotI using T4 ligase (New



England Biolabs), and used to transform competent ampicillin-resistant E. Coli. These were plated on LB-ampicillin plates and incubated at 37°C overnight, then a single colony was grown in 4mL of 2XYT-ampicillin (100mg/mL) medium overnight at 37°C. The Denville Miniprep Purification Kit was used to lyse the bacteria and purify the plasmid DNA. The concentration of the products was determined using an Eppendorf Biophotometer, and then adjusted to 100ng/μL using TE buffer. The products were sequenced using BigDye Terminator Sequencing Kit (Applied Biosystems), purified using Sephadex (GE Healthcare), and sequenced with 3130 Genetic Analyzer (Applied Biosystems).

**Luciferase assay.** Functionality was tested by a Luciferase assay as described in Zhuang and Matsunami<sup>19</sup>. Hana3A cells were plated in Minimum Essential Medium (MEM) containing 10% FBS (vol/vol), penicillin-treptomycin and amphotericin B on Poly-D-lysine coated 96-well plates (Corning #3843) and co-transfected using Lipofectamine2000 (Invitrogen) with the prepared Rho-tagged OR or the empty vector pCI (negative control), RTP1S (Zhang and Matsunami, 2007), and the muscarinic receptor M3 (Li and Matsunami, 2011). The cells were transfected with elements from the Dual-Glo Luciferase Assay System (Promega): the cAMP response element (CRE) coupled with a luciferase reporter gene (L); and the constitutively active SV40 promoter region coupled with the Renilla luciferase (RL) reporter. In a period of 18-24 hours after transfection, the medium was replaced with 0 μM, 1 μM, 3.16 μM, 10 μM, 31.6 μM, 100 μM, or 316 μM of odorants (Sigma Aldrich) in CD293 (Gibco) containing glutamine and copper and incubated for 3.5 hours. After the addition of Dual-Glo luciferase substrate



and buffer (Promega), plates were read using BMG Labtech POLARStar Optima plate reader. Promega Stop-and-Glo buffer and RL substrate were added and plates were read again. The degree of activation was quantified for each well in Microsoft Excel using the formula (L-400)/(RL-400) and reported on the y axis (emitted in lumens). The RL quantification is made due to variation in cell numbers in each well and the 0 $\mu$ M values provide the basal activity value for each OR. 0 $\mu$ M thus served as a comparison to identify OR response values to odorant stimulations —if the odor value on the y-axis exceeded the 0 $\mu$ M value, the OR was taken to have responded to the odor but if the odor value did not exceed the 0 $\mu$ M value, the OR was considered unresponsive. Dose responses and EC50s were determined with Graphpad Prism 9. Activity index have been calculated from dose responses by multiplying the absolute value of the logEC50 to the efficacy. If EC50 could not be determined because the dose response did not reached its plateau, logEC50 were set as the arbitrary value -2. These values were used for Table 1 along with odor descriptors and olfactory notes from Good Scents <sup>56</sup>

**Flowcytometry.** The cell surface expression of the Rho-tagged ORs was evaluated as described in Ikegami, de March et al. <sup>26</sup>. HEK293 cells were plated in 35 mm plates at 25% confluency and grown overnight at 37°C and 5% CO<sub>2</sub>. The cells were then transfected with the Rho-tagged ORs and GFP using the Lipofectamine2000 reagent (ThermoFisher Scientific) in MEM supplemented with 10% FBS. 18 to 24h later, the cells were detached from the plates with cellstripper and resuspended in PBS containing 15 mM NaN<sub>3</sub>, 2% FBS in ice. The cells were then centrifuged at 4°C and resuspended and incubated for at least 30min in primary antibody (mouse anti Rho4D2,

Millipore Sigma). The cells were then centrifuged at 4°C and resuspended and incubated for at least 30 min and in the dark in phycoerythrin (PE)-donkey anti-mouse F(ab')<sub>2</sub> Fragment antibody (Jackson Immunologicals: 715-116-150). Finally, the cells were stained with 7-Amino-actinomycin D (7AAD, Calbiochem). The cell surface expression was monitored through the PE fluorescence emitted by cells GFP positive, single, spherical, viable and 7AAD negative using a BD FACSCanto II. The results were analyzed with Flowjo. Olfr539 and Olfr541 were added to the experiment plan as positive and negative, respectively, controls of OR cell surface expression.

**Homology model.** The protocol followed a previously published method<sup>55</sup>. 391 human OR sequences were aligned on Jalview to pre-aligned sequences of 11 GPCRs including bovine rhodopsin (PDB: 1U19), human chemokine receptors CXCR4 (PDB: 3ODU) and CXCR1 (PDB: 2LNL), and human adenosine a2A receptor (PDB: 2YDV) using Jalview<sup>57</sup>. The four experimental GPCR structures (1U19, 3ODU, 2YDV and 2LNL) were used as templates to build the human consensus OR by homology modeling with Modeller. The human consensus amino acid sequence was determined by aligning 391 human OR sequences and by selecting the most conserved amino acid for each position. Five models were obtained and the one fulfilling several constraints (binding cavity sufficiently large, no large folded structure in extra-cellular loops, all TMs folded as  $\alpha$ -helices, a small  $\alpha$ -helix structure between TM3 and TM4) was retained for further structural analysis. Visualization of the models and picture generation were performed with VMD.

**Regression Analysis.** Data were analyzed in R for Windows 4.1.0, using the R Studio GUI for Windows 1.4.1717. Data were wrangled using dplyr<sup>45</sup> and tidyverse<sup>46</sup>. The dose response dependent variable was fitted to distributions using fitdistrplus<sup>58</sup> and formed log normal distributions. The natural log was used to transform to normally distributed data for linear regression models. The car package<sup>59</sup> was used for ANOVA. 0μM values, as noted above, provided a control (the baseline threshold of OR activation). Because the number of cells varied across plates, the OR tested for each sample had a different 0μM. As such, removing values below the 0μM for each correlation between humans and ancient DNA sample resulted in some odors missing values for one of the lineages. We compared the results of regression for testing using only active ORs (above the 0μM value) and for the full set of ORs—the results were nearly identical (Fig. 2a-b, Extended Data Fig. 10). Testing the full suite of responses, active or below the threshold, allowed a broader comparison of how these cells operate. Analysis was conducted on the full dataset for both between sample correlations and for mean difference testing. Plots for data visualization and results were created using ggplot2<sup>60</sup> and ggpubr<sup>61</sup>. Panels were created using cowplot<sup>62</sup> and ggarrange.

## References

- 4 Hughes, G. M., Teeling, E. C. & Higgins, D. G. Loss of olfactory receptor function in hominin evolution. *PLoS One* **9**, e84714, doi:10.1371/journal.pone.0084714 (2014).
- 19 Zhuang, H., Chien, M. & Matsunami, H. Dynamic functional evolution of an odorant receptor for sex-steroid-derived odors in primates. *Proceedings of the National Academy of Sciences* **106**, 21247 - 21251 (2009).
- 20 Mafessoni, F. *et al.* A high-coverage Neandertal genome from Chagyrskaya Cave. *Proceedings of the National Academy of Sciences* **117**, 15132-15136, doi:10.1073/pnas.2004944117 (2020).

- 26 Ikegami, K. *et al.* Structural instability and divergence from conserved residues underlie intracellular retention of mammalian odorant receptors. *Proceedings of the National Academy of Sciences* **117**, 2957-2967, doi:10.1073/pnas.1915520117 (2020).
- 36 The Genomes Project Consortium. The 1000 Genomes Project Consortium. *Nature* **526**, 68-74, doi:10.1038/nature15393 (2015).
- 37 Prüfer, K. *et al.* A high-coverage Neandertal genome from Vindija Cave in Croatia. *Science*, doi:10.1126/science.aao1887 (2017).
- 38 Prieto-Godino, L. L. *et al.* Olfactory receptor pseudo-pseudogenes. *Nature* **3**, 93-97, doi:10.1038/nature19824 (2016).
- 39 Barnes, I. H. A. *et al.* Expert curation of the human and mouse olfactory receptor gene repertoires identifies conserved coding regions split across two exons. *BMC Genomics* **21**, 196, doi:10.1186/s12864-020-6583-3 (2020).
- 40 Danecek, P. *et al.* The variant call format and VCFtools. *Bioinformatics (Oxford, England)* **27**, 2156-2158, doi:10.1093/bioinformatics/btr330 (2011).
- 41 Multiallelic calling model in bcftools (-m), samtools.github.io/bcftools/call-m.pdf.
- 42 R Development Core Team. Vol. R Foundation for Statistical Computing (Vienna, Austria, 2008).
- 43 RStudio: Integrated Development for R (RStudio, Inc., Boston, MA, 2015).
- 44 readxl: Read Excel Files. R package version 1.3.1. <https://CRAN.R-project.org/package=readxl> (2019).
- 45 dplyr: A Grammar of Data Manipulation. R package version 0.7.6. <https://CRAN.R-project.org/package=dplyr> (2018).
- 46 Wickham, H. *et al.* Welcome to the tidyverse. *Journal of Open Source Software* **4**, 1686, doi:<https://doi.org/10.21105/joss.01686> (2019).
- 47 Efficient manipulation of biological strings. R package version 2.58.0. <https://bioconductor.org/packages/Biostrings> (2020).
- 48 gridExtra: Miscellaneous Functions for "Grid" Graphics. R package version 2.3. <https://CRAN.R-project.org/package=gridExtra> (2017).
- 49 Gadagkar, S. R., Rosenberg, M. S. & Kumar, S. Inferring species phylogenies from multiple genes: concatenated sequence tree versus consensus gene tree. *J. Exp. Zool. B Mol. Dev. Evol.* **304**, 64-74, doi:10.1002/jez.b.21026 (2005).
- 50 Paradis, E., Claude, J. & Strimmer, K. APE: analyses of phylogenetics and evolution in R language. *Bioinformatics* **20**, 289-290 (2004).
- 51 Charif, D. & Lobry, J. R. in *Structural approaches to sequence evolution: Molecules, networks, populations Biological and Medical Physics, Biomedical Engineering* (eds U. Bastolla, M. Porto, Roman. H.E, & M. Vendruscolo) 207-232 (Springer Verlag, 2007).
- 52 Wilkinson, S. P. & Davy, S. K. phylogram: An r Package for Phylogenetic Analysis with Nested Lists. *Journal of Open Source Software* **3**, doi:<https://doi.org/10.21105/joss.00790>. (2018).
- 53 Zheng, X. *et al.* A High-Performance Computing Toolset for Relatedness and Principal Component Analysis of SNP Data. *Bioinformatics* **28**, 3326-3328, doi:<https://doi.org/10.1093/bioinformatics/bts606>. (2012).

54 Galili, T. Dendextend: An r Package for Visualizing, Adjusting, and Comparing  
Trees of Hierarchical Clustering. *Bioinformatics*,  
doi:<https://doi.org/10.1093/bioinformatics/btv428>. (2015).  
55 Bushdid, C., de March, C. A., Matsunami, H. & Golebiowski, J. in *Olfactory  
Receptors: Methods and Protocols* (eds Fabio Marques Simoes de Souza &  
Gabriela Antunes) 77-93 (Springer New York, 2018).  
56 GoodScentsCo. *The GoodScents Company*. <http://thegoodscentscompany.com/>.  
57 de March, C. A., Ryu, S., Sicard, G., Moon, C. & Golebiowski, J. Structure–odour  
relationships reviewed in the postgenomic era. *Flavour and Fragrance Journal*  
**30**, 342-361, doi:10.1002/ffj.3249 (2015).  
58 Delignette-Muller, M. L. & Dutang, C. fitdistrplus: An R Package for Fitting  
Distributions. *Journal of Statistical Software* **64**, 1-34 (2015).  
59 Fox, J. & Weisberg, S. *An {R} Companion to Applied Regression*. (Sage, 2011).  
60 Wickham, H. *ggplot2: Elegant Graphics for Data Analysis*. (Springer-Verlag,  
2016).  
61 ggpubr: 'ggplot2' Based Publication Ready Plots. R package version 0.2.  
<https://CRAN.R-project.org/package=ggpubr> (2018).  
62 cowplot: Streamlined Plot Theme and Plot Annotations for 'ggplot2'. R package  
version 1.1.0. <https://CRAN.R-project.org/package=cowplot> (2020).

**Acknowledgements.** The high-performance computing and data storage resources operated by the Research Computing Systems Group at the University of Alaska Fairbanks, Geophysical Institute. US National Science Foundation Award #1550409 (KCH), NIH K99DC018333 (CADM), NSF# 1556207 (HM), NIH DC014423 and NIH DC016224

**Author contributions.**

- KCH contributed to the conception or design of the work, acquisition and analysis of genetic and protein sequence data, interpretation of genetic and functional analysis data, drafted the work and substantively revised the work.
- CADM contributed to the acquisition, analysis, and interpretation of in vitro data including the production of ancient and contemporary OR DNA, protein activation and expression data and protein models, and drafted and substantively revised the work.
- HM contributed to the design and revision of the work
- MC contributed to the design and substantive revision of the work.
- MA contributed to the production of ancient and contemporary OR DNA and acquisition of protein activation data to work.

CADM and KHC contributed equally to the work

**Competing interests.** The authors declare no competing interests.

**Supplementary Information.** Supplementary Information is available for this paper.

**Materials & Correspondence.** Correspondence and requests for materials should be addressed to Professor Kara C. Hoover, University of Alaska Fairbanks, Fairbanks Alaska 99775 ([kchoover@alaska.edu](mailto:kchoover@alaska.edu)) or Dr. Claire de March, Duke University, Durham, NC 27710 ([claire.de.march@duke.edu](mailto:claire.de.march@duke.edu))

Reprints and permissions information is available at [www.nature.com/reprints](http://www.nature.com/reprints)

**Extended Data Fig. 1: Phylogenetic tree of Hominids**

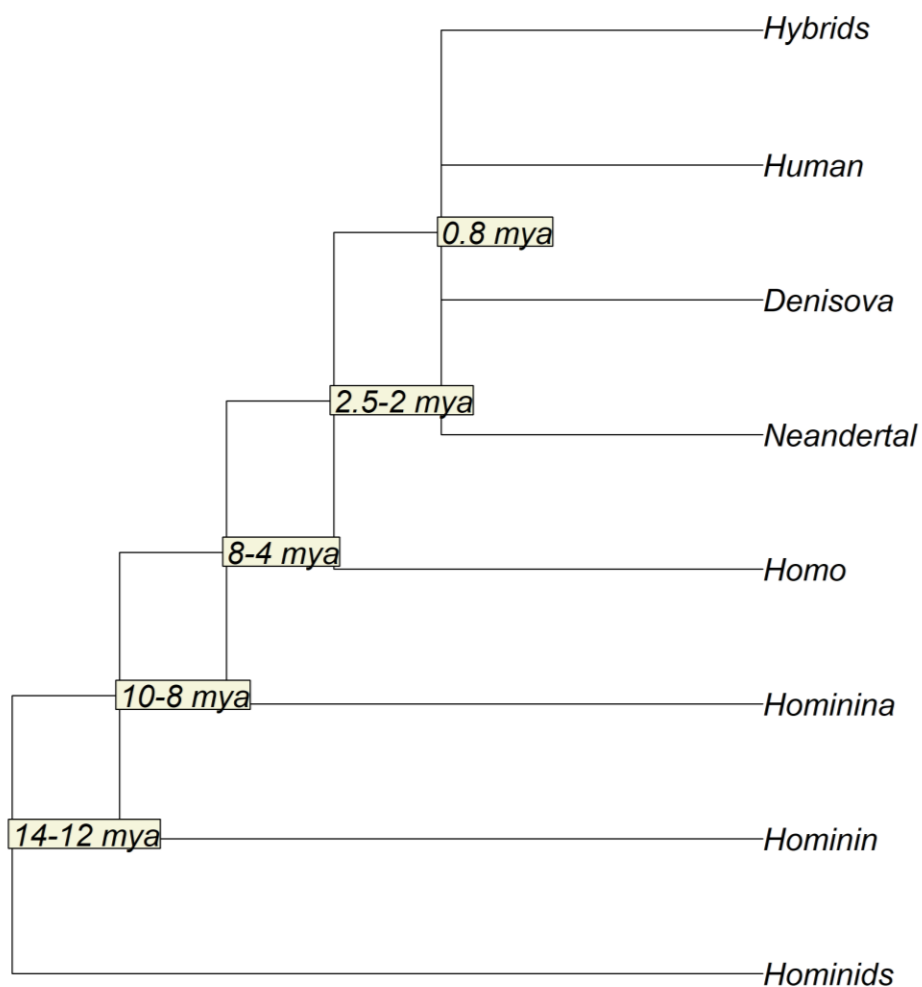

## Extended Data Fig. 2: Materials and accession numbers for published genomic data

| Lineage          | Specimen      | Location              | Date             | Accession/DOI                                                        |
|------------------|---------------|-----------------------|------------------|----------------------------------------------------------------------|
| Denisova         | Denisova3     | Altai Mts,<br>Siberia | 74-82K BP        | PRJEB3092<br>10.1126/science.1224344                                 |
| Neandertal       | Altai         | Altai Mts,<br>Siberia | 50.3KYA ±<br>2.2 | PRJEB1265<br>10.1038/nature12886                                     |
|                  | Chagyrskaya   | Altai Mts,<br>Siberia | 781-126 KYA      | eva.mpg.de/neandertal/Chagyrskaya/VCF/<br>10.1016/j.aaae.2013.07.002 |
|                  | Mezmaiskaya1  | Russian<br>Caucasus   | 60-70 KYA        | PRJEB21195<br>10.1126/science.aao1887                                |
|                  | Vindija 33.19 | Croatia               | ~50 KYA          | PRJEB21157<br>10.1126/science.aao1887                                |
| Ancient<br>Human | Ust'-Ishim    | Western<br>Siberia    | 49K BP           | PRJEB6622<br>10.1038/nature13810                                     |
| Humans           | 1000 Genomes  | global                | living           | ftp://ftp.1000genomes.ebi.ac.uk/vol1/ftp/release/<br>20130502/       |



**Extended Data Fig. 3: 1000 Genomes populations**

|                | <b>Group</b>          | <b>n</b> |
|----------------|-----------------------|----------|
| Africa         | Esan, Nigeria         | 99       |
|                | Gambian               | 113      |
|                | Luhye, Kenya          | 99       |
|                | Mende, Sierra Leone   | 85       |
|                | Yoruban, Nigeria      | 108      |
| East Asia      | Chinese-Beijing Han   | 103      |
|                | Chinese-Southern Han  | 105      |
|                | Chinese-Dai           | 93       |
|                | Japanese              | 104      |
| Southeast Asia | Kinh, Vietnam         | 99       |
| Southwest Asia | Bangaldeshi           | 86       |
|                | Gujarati, Houston     | 103      |
|                | Punjabi, Pakistan     | 96       |
|                | Tamil (Sri Lanka), UK | 102      |
|                | Telugu, UK            | 102      |
| Europe         | American White, Utah  | 99       |
|                | British               | 99       |
|                | Finn                  | 99       |
|                | Iberian, Spain        | 107      |
|                | Tuscan                | 107      |
| Americas       | American Black        | 61       |
|                | Caribbean Black       | 91       |
|                | Columbian             | 94       |
|                | Mexicans, LA          | 64       |
|                | Peruvian              | 85       |
|                | Puerto Rican          | 104      |

**Extended Data Fig. 4: Summary of Genetic and Protein Variation**

| Group                          | Mean |         | Range |         | StDev |         |
|--------------------------------|------|---------|-------|---------|-------|---------|
|                                | DNA  | Protein | DNA   | Protein | DNA   | Protein |
| Africa Esan                    | 1.01 | 1.85    | 3.20  | 4.49    | 0.92  | 1.04    |
| Africa Gambian                 | 1.03 | 2.02    | 3.42  | 5.45    | 0.94  | 1.13    |
| Africa Luhye                   | 1.13 | 2.18    | 3.63  | 5.46    | 1.01  | 1.27    |
| Africa Mende                   | 1.03 | 1.90    | 3.10  | 4.17    | 0.92  | 0.99    |
| Africa Nigeria                 | 1.08 | 2.02    | 3.64  | 5.78    | 1.01  | 1.23    |
| Americas Black                 | 0.97 | 1.80    | 3.21  | 4.53    | 0.93  | 1.06    |
| Americas Black Carribean       | 1.10 | 2.56    | 3.63  | 5.78    | 1.01  | 1.39    |
| Americas Columbian             | 0.92 | 1.72    | 3.21  | 4.49    | 0.91  | 1.05    |
| Americas Mexican               | 0.73 | 1.37    | 2.99  | 3.53    | 0.83  | 0.84    |
| Americas Peruvian              | 0.80 | 1.45    | 3.10  | 3.85    | 0.89  | 0.93    |
| Americas Puerto Rican          | 0.93 | 1.74    | 3.52  | 4.90    | 0.92  | 0.97    |
| American White                 | 0.75 | 1.33    | 2.90  | 2.25    | 0.87  | 0.70    |
| Ancient Denisova               | 0.40 | 0.29    | 2.46  | 1.25    | 0.74  | 0.35    |
| Ancient Human-Ust'-Ishim       | 0.39 | 0.17    | 2.46  | 0.64    | 0.74  | 0.22    |
| Ancient Neandertal Altai       | 0.38 | 0.21    | 2.35  | 1.25    | 0.70  | 0.29    |
| Ancient Neandertal Chagyrskaya | 0.40 | 0.20    | 2.46  | 1.25    | 0.74  | 0.29    |
| Ancient Neandertal Vindija     | 0.36 | 0.17    | 2.35  | 1.25    | 0.70  | 0.28    |
| Asia Dai                       | 0.68 | 1.20    | 3.42  | 3.85    | 0.93  | 0.86    |
| Asia Han Beijing               | 0.76 | 1.34    | 3.22  | 4.53    | 0.87  | 0.92    |
| Asia Han Southern              | 0.72 | 1.41    | 3.31  | 4.17    | 0.86  | 0.82    |
| Asia Japanese                  | 0.68 | 1.26    | 3.10  | 3.21    | 0.92  | 0.82    |
| Asia Kihn                      | 0.75 | 1.43    | 3.31  | 4.21    | 0.87  | 0.86    |
| Europe British                 | 0.75 | 1.25    | 3.10  | 2.57    | 0.91  | 0.67    |
| Europe Finn                    | 0.70 | 1.24    | 2.87  | 2.56    | 0.84  | 0.67    |
| Europe Spanish                 | 0.88 | 1.48    | 2.99  | 3.21    | 0.88  | 0.80    |
| Europe Tuscan                  | 0.84 | 1.44    | 3.53  | 4.17    | 0.89  | 0.91    |
| SW Asia Bangaldeshi            | 0.83 | 1.53    | 3.31  | 3.85    | 0.87  | 0.88    |
| SW Asia Gujarati               | 0.83 | 1.54    | 3.42  | 4.17    | 0.89  | 0.83    |
| SW Asia Pakistan               | 0.84 | 1.53    | 3.53  | 4.50    | 0.92  | 0.96    |
| SW Asia Tamil                  | 0.81 | 1.45    | 3.63  | 3.53    | 0.92  | 0.78    |
| SW Asia Telugu                 | 0.80 | 1.51    | 3.42  | 4.17    | 0.91  | 0.97    |

**Extended Data Fig. 5: Fst for 30 OR genes in extinct lineages and 1000 genomes (1KG) data**

| <b>Gene</b> | <b>Fst: Among 1KG populations</b> | <b>Gene</b> | <b>Fst: 1KG versus Extinct Lineages</b> |
|-------------|-----------------------------------|-------------|-----------------------------------------|
| OR5P3       | 0.114                             | OR7C1       | 0.445                                   |
| OR1C1       | 0.087                             | OR1C1       | 0.379                                   |
| OR10J5      | 0.068                             | OR5AN1      | 0.279                                   |
| OR8D1       | 0.063                             | OR10J5      | 0.251                                   |
| OR2B11      | 0.061                             | OR51E2      | 0.244                                   |
| OR51E1      | 0.059                             | OR51E1      | 0.197                                   |
| OR56A4      | 0.058                             | OR10G3      | 0.195                                   |
| OR4E2       | 0.056                             | OR8D1       | 0.185                                   |
| OR2A25      | 0.051                             | OR5A1       | 0.185                                   |
| OR2J3       | 0.043                             | OR5P3       | 0.151                                   |
| OR51E2      | 0.042                             | OR2C1       | 0.133                                   |
| OR5A1       | 0.040                             | OR10A6      | 0.133                                   |
| OR7D4       | 0.037                             | OR4E2       | 0.126                                   |
| OR1A1       | 0.034                             | OR2B11      | 0.091                                   |
| OR5K1       | 0.031                             | OR10G4      | 0.074                                   |
| OR2W1       | 0.029                             | OR1A1       | 0.070                                   |
| OR2J2       | 0.028                             | OR8K3       | 0.046                                   |
| OR4Q3       | 0.028                             | OR56A4      | 0.036                                   |
| OR7C1       | 0.028                             | OR2J3       | 0.013                                   |
| OR10G7      | 0.028                             | OR2A25      | 0.012                                   |
| OR51L1      | 0.025                             | OR2W1       | 0.008                                   |
| OR6P1       | 0.024                             | OR51L1      | 0.000                                   |
| OR8K3       | 0.024                             | OR11A1      | 0.000                                   |
| OR10G3      | 0.024                             | OR2J2       | 0.000                                   |
| OR5AN1      | 0.023                             | OR10G7      | 0.000                                   |
| OR10G4      | 0.022                             | OR7D4       | 0.000                                   |
| OR11A1      | 0.022                             | OR6P1       | 0.000                                   |
| OR2C1       | 0.015                             | OR4Q3       | 0.000                                   |
| OR8B3       | 0.010                             | OR5K1       | 0.000                                   |
| OR10A6      | 0.009                             | OR8B3       | 0.000                                   |
| <b>Mean</b> | <b>0.0394</b>                     | <b>Mean</b> | <b>0.108</b>                            |

**Extended Data Fig. 6: 2016 VCF Novel Variants**

| <b>Gene</b> | <b>Position</b> | <b>Substitution</b> | <b>Sample</b> | <b>Qual</b> | <b>Depth</b> | <b>GQ</b> | <b>Note</b> |
|-------------|-----------------|---------------------|---------------|-------------|--------------|-----------|-------------|
| OR1A1       | 17:3119050      | V46I                | Denisova      | 142         | 34           | 99        | 1           |
|             | 17:3119684      | T257M               | Denisova      | 141         | 37           | 99        | 1           |
| OR1C1       | 1:247921351     | Y120H               | Chagyrskaya   | 74          | 23           | 74        |             |
| OR2B11      | 1:247614839     | V149E               | Denisova      | 148         | 38           | 99        | 1           |
| OR2C1       | 16:3406581      | I214T               | Denisova      | 113         | 27           | 99        | 1           |
| OR5P3       | 11:7847045      | F159L               | Vindija       | 87          | 18           | 89        |             |
| OR6P1       | 1:158532749     | S216A               | Altai         | 174         | 47           | 99        | 1           |
|             |                 |                     | Chagyrskaya   | 85          | 17           | 86        |             |
|             | 1:158533360     | F12S                | Denisova      | 102         | 23           | 99        | 1           |
| OR10G3      | 14:22038287     | E197K               | Denisova      | 120         | 29           | 99        | 1           |
| OR10J5      | 1:159505737     | G21R                | Denisova      | 142         | 48           | 99        |             |
| <b>Gene</b> | <b>Position</b> | <b>Synonymous</b>   | <b>Sample</b> | <b>Qual</b> | <b>Depth</b> | <b>GQ</b> | <b>Note</b> |
| OR2B11      | 1:247615024     | V87                 | Denisova      | 541         | 42           | 99        | 1           |
| OR5AN1      | 11:59132645     | A238A               | Chagyrskaya   | 22          | 17           | 22        |             |
| OR10A6      | 11:7950075      | I45I                | Denisova      | 79          | 26           | 79        | 1           |
| OR10G7      | 11:123908878    | T277                | Altai         | 415         | 51           | 99        | 1           |
|             |                 |                     | Chagyrskaya   | 128         | 20           | 99        |             |
|             |                 |                     | Vindija       | 96          | 19           | 98        |             |

**Extended Data Fig. 7: Cladogram based on full amino acid sequences for all 30 odorant receptors in ancient lineages and in 1000 Genomes populations.**

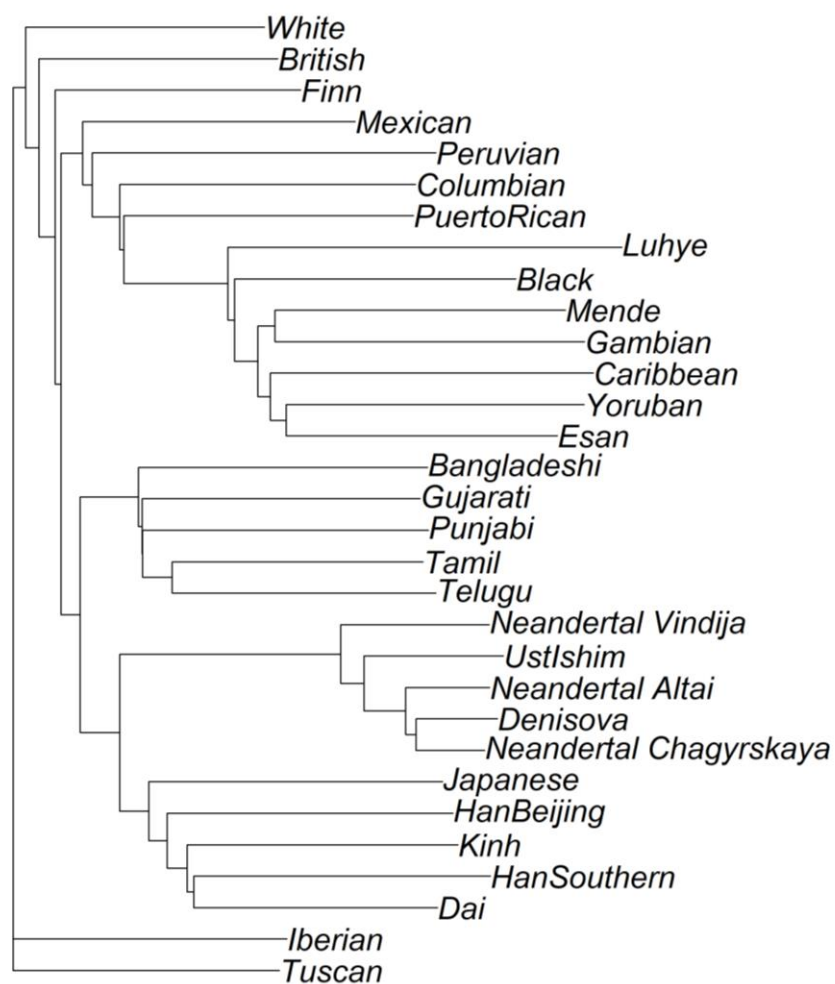

**Extended Data Fig. 8: Functionality of hominin OR variants.** Each Denisova (a) and Neandertal (b) OR response was first tested in luciferase assay against seven odorants (100 $\mu$ M) previously identified as evoking responses in human OR1A1<sup>1-3</sup>, OR1C1<sup>1</sup>, OR2C1<sup>2</sup>, OR10J5<sup>1,2</sup>, OR5P3<sup>1,2</sup>, and OR10G3<sup>1</sup>. The empty vector pCI was added to each experiment as a control of OR-specific response. The y-axis represents the normalized luminescence as a measure of OR activation. Asterisks represent the level of significance in a paired t-test between the odorant stimulation and the no odor (0 $\mu$ M) control for each OR (\* p<0.05; \*\* p<0.01; \*\*\* p<0.001). c. Cell surface expression of all OR variants. Olfr539 and Olfr541, served as positive and negative control of cell surface presence, respectively. d. Dose response of the false positives detected in the screening (a).

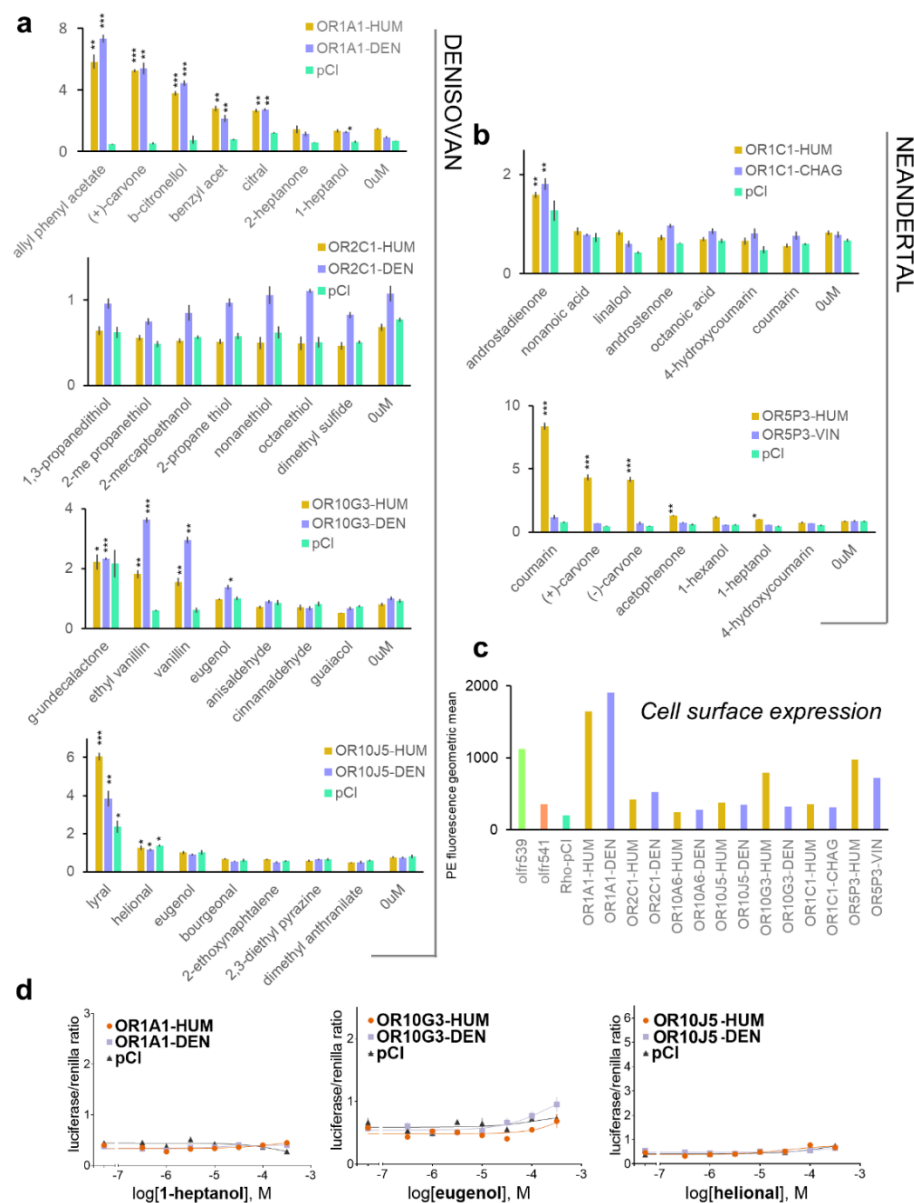

**Extended Data Fig. 9: OR2B11 and OR6P1 response.** **a.** Activation screening for OR2B11 and OR6P1 against more than 300 odorant molecules at 100  $\mu$ M. **b.** List of odorants selected for validation by dose response. **c.** Dose-responses of OR2B11 to the odorants listed in **b.** **d.** Dose-responses of OR6P1 to the odorants listed in **b.** In panels **a**, **c** and **d** the y-axis represents the normalized luminescence response that is synonymous with OR activation.

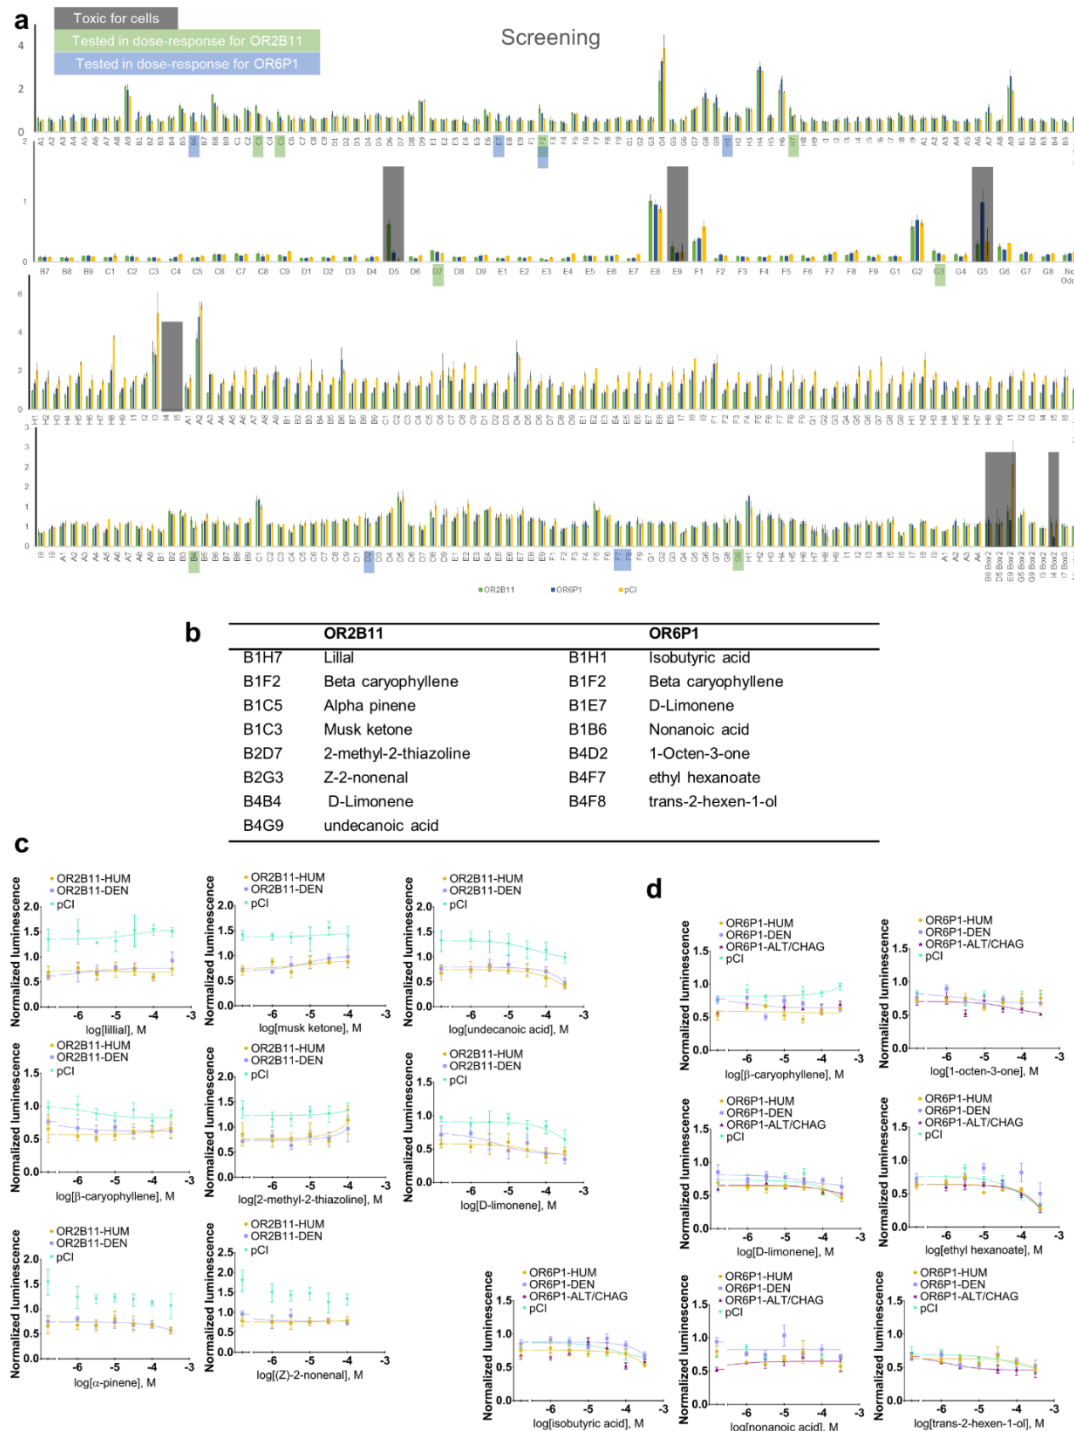

Extended Data Fig. 10: Regression results for active ORs only

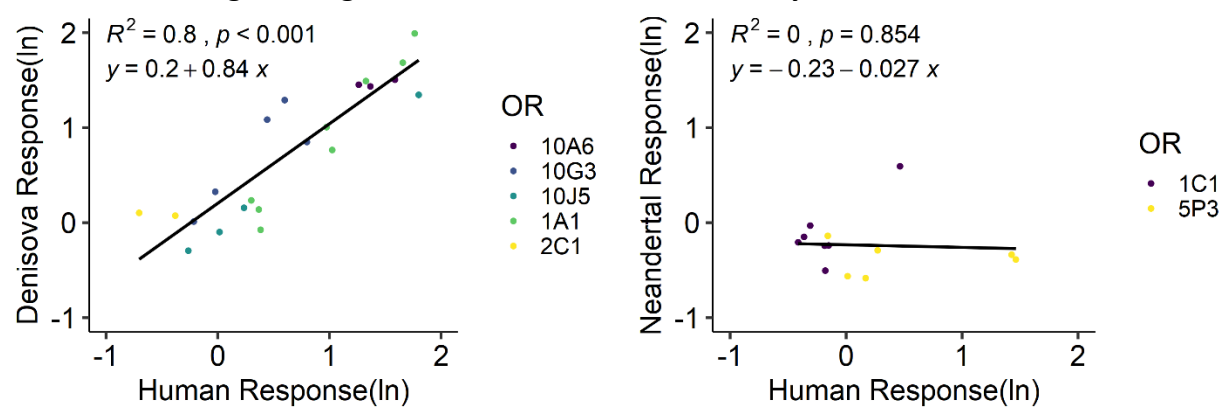



**Supplementary Information:**

**Genetic and functional odorant receptor variation in the Homo lineage**

Claire A. de March <sup>1,\*</sup>, Hiroaki Matsunami <sup>1,2</sup> Masashi Abe <sup>1,3</sup>, Matthew Cobb <sup>4</sup>, Kara C. Hoover <sup>5,\*</sup>

<sup>1</sup> Department of Molecular Genetics and Microbiology, Duke University Medical Center, Durham, NC 27710, USA

<sup>2</sup> Department of Neurobiology, Duke Institute for Brain Sciences, Duke University, Durham, NC 27710, USA

<sup>3</sup> Department of Biotechnology and Life Science, Tokyo University of Agriculture and Technology, Tokyo 184-8588, Japan

<sup>4</sup> Faculty of Life Sciences, The University of Manchester, Oxford Road, Manchester, M13 9PL, USA

<sup>5</sup> Department of Anthropology, University of Alaska Fairbanks, Fairbanks Alaska, 99775, USA

\* equal contribution / correspondence

**Materials & Correspondence.** Correspondence and requests for materials should be addressed to Professor Kara C. Hoover, University of Alaska Fairbanks, Fairbanks Alaska 99775 ([kchoover@alaska.edu](mailto:kchoover@alaska.edu)) or Dr. Claire de March, Duke University, Durham, NC 27710 ([claire.de.march@duke.edu](mailto:claire.de.march@duke.edu))

**Contents**

Part 1: Supplemental Data for 2016 VCF data (main paper)

Part 2: Functional Expression Analysis of 2013 VCF data

## **PART 1: SUPPLEMENTAL DATA FOR 2016 VCF DATA (MAIN PAPER)**

**SI Table 1: Target Genes**

| Gene   | Chr | Region              | Odorant                    | Description                           |
|--------|-----|---------------------|----------------------------|---------------------------------------|
| OR6P1  | 1   | 158532441-158533394 | anisaldehyde               | anise, licorice                       |
| OR10J5 | 1   | 159504868-159505797 | lyral                      | floral, lily                          |
| OR2B11 | 1   | 247614331-247615284 | coumarin                   | grassy, vanilla, almond               |
| OR1C1  | 1   | 247920764-247921708 | linalool                   | floral, bergamot, lavender            |
| OR5K1  | 3   | 98188421-98189347   | eugenol methyl ether       | clove-like                            |
| OR2W1  | 6   | 29011990-29012952   | cis-3-hexen-1-ol           | freshly cut grass, leaves             |
| OR2J3  | 6   | 29079588-29080603   | cinnamaldehyde, cinnamon   | cinnamon                              |
| OR2J2  | 6   | 29141413-29142351   | ethyl vanillin             | vanilla                               |
| OR11A1 | 6   | 29394471-29395418   | 2-ethylfenchol             | soil, earth, peat                     |
| OR2A25 | 7   | 143771313-143772245 | geranyl acetate            | floral, fruity, rose                  |
| OR51E1 | 11  | 4673757-4674713     | isovaleric acid            | sweat, cheese                         |
| OR51E2 | 11  | 4702979-4703941     | androstenone, musk         | β-ionone, violet-rose                 |
| OR51L1 | 11  | 5020213-5021160     | allyl phenyl acetate       | honey                                 |
| OR56A4 | 11  | 6023281-6024378     | undecanal                  | green coffee, leafy                   |
| OR5P3  | 11  | 7846584-7847519     | coumarin                   | grassy, vanilla, almond               |
| OR10A6 | 11  | 7949265-7950209     | 3-phenyl propyl propionate | floral balsam hyacinth mimosa         |
| OR8K3  | 11  | 56085783-56086721   | menthol                    | mint, menthol                         |
| OR5AN1 | 11  | 59131932-59132867   | muscone                    | musk                                  |
| OR5A1  | 11  | 59210642-59211589   | β-ionone                   | violet rose                           |
| OR10G4 | 11  | 123886282-123887217 | vanillin                   | vanilla                               |
| OR10G7 | 11  | 123908773-123909708 | eugenol methyl ether       | clove-like (fruits and spices)        |
| OR8D1  | 11  | 124179736-124180662 | caramel furanone           | low-burnt sugar, high-fenugreek/curry |
| OR8B3  | 11  | 124266306-124267247 | .+(-) and -(-)carvone      | spearmint and caraway                 |

|        |    |                       |                              |                 |
|--------|----|-----------------------|------------------------------|-----------------|
| OR4Q3  | 14 | 20215587-<br>20216528 | eugenol methyl ether         | clove-like      |
| OR10G3 | 14 | 22037934-<br>22038875 | vanillin                     | vanilla         |
| OR4E2  | 14 | 22133297-<br>22134238 | n-amyl acetate               | bananas, apples |
| OR2C1  | 16 | 3405941-<br>3406879   | octanethiol                  | sulphur         |
| OR1A1  | 17 | 3118915-<br>3119844   | -(-)carvone                  | spearmint       |
| OR7D4  | 19 | 9324575-<br>9325513   | androstenone, adrostadienone | musk            |
| OR7C1  | 19 | 14909986-<br>14910948 | androstadienone              | musk            |

---

**SI Table 2: 2016 VCF Shared Variants**

| Gene   | Substitution | Position    | RS          | Specimen    | Quality | Depth | GQ | Note |
|--------|--------------|-------------|-------------|-------------|---------|-------|----|------|
| OR1A1  | V233M        | 17:3119611  | rs17762735  | Ust'-Ishim  | 503     | 39    | 99 | 1    |
| OR2A25 | A209P        | 7:143771937 | rs2961135   | Altai       | 137     | 35    | 99 | 1    |
|        |              |             |             | Chagyrskaya | 100     | 22    | 99 |      |
|        |              |             |             | Denisova    | 108     | 25    | 99 | 1    |
|        |              |             |             | Vindija     | 111     | 26    | 99 |      |
| OR2A25 | S75N         | 7:143771536 | rs6951485   | Altai       | 159     | 40    | 99 | 1    |
|        |              |             |             | Chagyrskaya | 100     | 20    | 99 |      |
|        |              |             |             | Denisova    | 99      | 20    | 99 | 1    |
|        |              |             |             | Vindija     | 125     | 29    | 99 |      |
| OR2B11 | S12P         | 1:247615251 | rs147030298 | Denisova    | 108     | 25    | 99 | 1    |
|        |              |             |             | Altai       | 213     | 30    | 99 | 1,2  |
|        |              |             |             | Chagyrskaya | 106     | 24    | 99 | 2    |
|        |              |             |             | Denisova    | 103     | 23    | 99 | 1,2  |
| OR2C1  | C149W        | 16:3406387  | rs1218763   | Altai       | 120     | 29    | 99 | 1    |
|        |              |             |             | Chagyrskaya | 92      | 31    | 92 |      |
|        |              |             |             | Denisova    | 128     | 32    | 99 | 1    |
|        |              |             |             | Ust'-Ishim  | 144     | 39    | 99 | 1    |
|        |              |             |             | Vindija     | 108     | 25    | 99 |      |
| OR2J2  | A302V        | 6:29142317  | rs41270628  | Altai       | 116     | 40    | 99 | 1    |
|        |              |             |             | Chagyrskaya | 111     | 26    | 99 |      |
|        |              |             |             | Vindija     | 81      | 16    | 83 |      |
| OR2J2  | K312M        | 6:29142347  | rs41270632  | Ust'-Ishim  | 109     | 27    | 99 | 1    |
| OR2J3  | R226Q        | 6:29080344  | rs3749977   | Denisova    | 125     | 29    | 99 | 1    |
| OR2W1  | D296N        | 6:29012067  | rs35771565  | Ust'-Ishim  | 152     | 41    | 99 |      |
| OR2W1  | P138S        | 6:29012541  | rs146659019 | Denisova    | 124     | 31    | 99 |      |
| OR4E2  | Q234R        | 14:22133997 | rs970382    | Altai       | 149     | 38    | 99 | 1    |
|        |              |             |             | Chagyrskaya | 126     | 32    | 99 |      |
|        |              |             |             | Denisova    | 147     | 38    | 99 | 1    |
|        |              |             |             | Ust'-Ishim  | 499     | 39    | 99 | 1    |
|        |              |             |             | Vindija     | 109     | 27    | 99 |      |
| OR4E2  | R233H        | 14:22133994 | rs200419591 | Denisova    | 155     | 39    | 99 | 1    |
| OR4E2  | V118M        | 14:22133648 | rs2874103   | Altai       | 201     | 53    | 99 | 1    |
|        |              |             |             | Chagyrskaya | 99      | 20    | 99 |      |
|        |              |             |             | Denisova    | 163     | 41    | 99 | 1    |
|        |              |             |             | Ust'-Ishim  | 439     | 47    | 99 | 1    |
|        |              |             |             | Vindija     | 131     | 31    | 99 |      |
| OR5A1  | D183N        | 11:59211188 | rs6591536   | Ust'-Ishim  | 109     | 25    | 99 | 1    |
| OR5A1  | G173R        | 11:59211158 | rs140829988 | Denisova    | 306     | 27    | 99 | 1    |
| OR5AN1 | L289F        | 11:59132798 | rs7941190   | Ust'-Ishim  | 168     | 47    | 99 | 1    |
| OR7C1  | E171K        | 19:14910438 | rs10415312  | Altai       | 205     | 58    | 99 | 1    |
|        |              |             |             | Chagyrskaya | 155     | 41    | 99 |      |
|        |              |             |             | Denisova    | 165     | 45    | 99 | 1    |
|        |              |             |             | Ust'-Ishim  | 184     | 52    | 99 | 1    |
|        |              |             |             | Vindija     | 140     | 37    | 99 |      |
| OR7C1  | R233K        | 19:14910251 | rs77999564  | Altai       | 235     | 67    | 99 | 1    |
|        |              |             |             | Chagyrskaya | 150     | 39    | 99 |      |

|        |       |              |             |             |     |    |    |   |
|--------|-------|--------------|-------------|-------------|-----|----|----|---|
|        |       |              |             | Denisova    | 175 | 47 | 99 | 1 |
|        |       |              |             | Vindija     | 152 | 40 | 99 |   |
| OR7C1  | S210P | 19:14910321  | rs16979912  | Altai       | 157 | 52 | 99 | 1 |
|        |       |              |             | Chagyrskaya | 100 | 24 | 99 |   |
|        |       |              |             | Denisova    | 147 | 38 | 99 | 1 |
|        |       |              |             | Vindija     | 96  | 21 | 98 |   |
| OR7C1  | V126I | 19:14910573  | rs10415562  | Altai       | 118 | 28 | 99 | 1 |
|        |       |              |             | Chagyrskaya | 79  | 15 | 80 |   |
|        |       |              |             | Denisova    | 87  | 18 | 89 | 1 |
|        |       |              |             | Ust'-Ishim  | 118 | 30 | 99 | 1 |
|        |       |              |             | Vindija     | 64  | 11 | 66 |   |
| OR8K3  | L122R | 11:56086147  | rs960193    | Altai       | 111 | 26 | 99 | 1 |
|        |       |              |             | Chagyrskaya | 91  | 19 | 93 |   |
|        |       |              |             | Denisova    | 87  | 27 | 87 | 1 |
|        |       |              |             | Ust'-Ishim  | 141 | 38 | 99 | 1 |
|        |       |              |             | Vindija     | 108 | 25 | 99 |   |
| OR10A6 | L287P | 11:7949350   | rs4758258   | Altai       | 52  | 48 | 53 | 1 |
|        |       |              |             | Chagyrskaya | 133 | 33 | 99 |   |
|        |       |              |             | Denisova    | 156 | 41 | 99 | 1 |
|        |       |              |             | Ust'-Ishim  | 486 | 43 | 99 | 1 |
|        |       |              |             | Vindija     | 92  | 21 | 93 |   |
| OR10G3 | R236Q | 14:22038170  | rs536842323 | Chagyrskaya | 152 | 23 | 99 |   |
| OR10G3 | S73G  | 14:22038659  | rs17792778  | Altai       | 131 | 32 | 99 | 1 |
|        |       |              |             | Chagyrskaya | 79  | 15 | 81 |   |
|        |       |              |             | Denisova    | 132 | 33 | 99 | 1 |
|        |       |              |             | Ust'-Ishim  | 334 | 34 | 99 | 1 |
|        |       |              |             | Vindija     | 115 | 27 | 99 |   |
| OR10G4 | A9V   | 11:123886308 | rs11219407  | Altai       | 102 | 23 | 99 | 1 |
|        |       |              |             | Chagyrskaya | 82  | 16 | 84 |   |
|        |       |              |             | Denisova    | 82  | 18 | 83 | 1 |
|        |       |              |             | Ust'-Ishim  | 12  | 4  | 12 | 1 |
|        |       |              |             | Vindija     | 40  | 11 | 40 |   |
| OR10G4 | A9V   | 11:123886307 | rs79057843  | Altai       | 224 | 23 | 99 | 1 |
|        |       |              |             | Chagyrskaya | 102 | 17 | 99 |   |
|        |       |              |             | Denisova    | 205 | 20 | 99 | 1 |
| OR51E1 | S11N  | 11:4673788   | rs17224476  | Chagyrskaya | 105 | 22 | 99 |   |
|        |       |              |             | Vindija     | 328 | 36 | 99 |   |
| OR51E1 | V205I | 11:4674369   | rs185465942 | Ust'-Ishim  | 34  | 32 | 34 | 1 |
| OR51L1 | A207V | 11:5020832   | rs10768450  | Ust'-Ishim  | 270 | 34 | 99 | 1 |
| OR51L1 | T196I | 11:5020799   | rs10768448  | Ust'-Ishim  | 446 | 45 | 99 | 1 |

| Gene  | Substitution | Position    | RS        | Specimen    | Quality | Depth | GQ | Note |
|-------|--------------|-------------|-----------|-------------|---------|-------|----|------|
| OR1A1 | Synonymous   | 17:3119008  | rs4325604 | Altai       | 169     | 45    | 99 | 1    |
|       |              |             |           | Chagyrskaya | 93      | 20    | 95 |      |
|       |              |             |           | Denisova    | 108     | 25    | 99 | 1    |
|       |              |             |           | Ust'-Ishim  | 169     | 47    | 99 | 1    |
|       |              |             |           | Vindija     | 109     | 31    | 99 |      |
| OR1C1 | Synonymous   | 1:247921352 | rs1552813 | Altai       | 139     | 35    | 99 | 1,2  |

|        |            |              |            |             |     |    |    |     |
|--------|------------|--------------|------------|-------------|-----|----|----|-----|
|        |            |              |            | Chagyrskaya | 102 | 23 | 99 | 2   |
|        |            |              |            | Denisova    | 121 | 29 | 99 | 1,2 |
| OR2C1  | Synonymous | 16:3406516   | rs11643487 | Altai       | 124 | 59 | 99 | 1   |
|        |            |              |            | Chagyrskaya | 115 | 27 | 99 | 1   |
|        |            |              |            | Ust'-Ishim  | 256 | 35 | 99 |     |
|        |            |              |            | Vindija     | 134 | 40 | 99 |     |
| OR2W1  | Synonymous | 6:29012116   | rs7341218  | Ust'-Ishim  | 163 | 43 | 99 | 1   |
| OR4E2  | Synonymous | 14:22133416  | rs12717305 | Altai       | 114 | 37 | 99 | 1   |
|        |            |              |            | Chagyrskaya | 121 | 29 | 99 |     |
|        |            |              |            | Denisova    | 135 | 39 | 99 | 1   |
|        |            |              |            | Ust'-Ishim  | 665 | 50 | 99 | 1   |
|        |            |              |            | Vindija     | 169 | 45 | 99 |     |
| OR5A1  | Synonymous | 11:59211265  | rs7941591  | Ust'-Ishim  | 66  | 28 | 66 | 1   |
| OR5P3  | Synonymous | 11:7847208   | rs1482791  | Ust'-Ishim  | 276 | 31 | 99 | 1   |
| OR5P3  | Synonymous | 11:7847466   | rs1482792  | Altai       | 345 | 51 | 99 | 1   |
|        |            |              |            | Denisova    | 168 | 45 | 99 | 1   |
|        |            |              |            | Ust'-Ishim  | 153 | 51 | 99 | 1   |
| OR5P3  | Synonymous | 11:7847472   | rs1482793  | Ust'-Ishim  | 724 | 53 | 99 | 1   |
| OR6P1  | Synonymous | 1:158533140  | rs12080815 | Altai       | 147 | 38 | 99 | 1,2 |
|        |            |              |            | Chagyrskaya | 91  | 19 | 92 | 2   |
| OR6P1  | Synonymous | 1:158533224  | rs12081915 | Altai       | 175 | 58 | 99 | 1,2 |
|        |            |              |            | Chagyrskaya | 82  | 23 | 82 |     |
| OR8D1  | Synonymous | 11:124179835 | rs4936918  | Altai       | 190 | 52 | 99 | 1   |
|        |            |              |            | Chagyrskaya | 140 | 35 | 99 |     |
|        |            |              |            | Denisova    | 165 | 21 | 99 | 1   |
|        |            |              |            | Vindija     | 91  | 19 | 93 |     |
| OR8D1  | Synonymous | 11:124180082 | rs4936919  | Altai       | 126 | 42 | 99 | 1   |
|        |            |              |            | Chagyrskaya | 133 | 33 | 99 |     |
|        |            |              |            | Denisova    | 234 | 22 | 99 | 1   |
|        |            |              |            | Vindija     | 104 | 27 | 99 |     |
| OR10G3 | Synonymous | 14:22038450  | rs11626669 | Altai       | 137 | 32 | 99 | 1   |
|        |            |              |            | Chagyrskaya | 74  | 12 | 75 |     |
|        |            |              |            | Denisova    | 102 | 21 | 99 | 1   |
|        |            |              |            | Vindija     | 132 | 31 | 99 |     |
| OR10G3 | Synonymous | 14:22038162  | rs17197261 | Altai       | 143 | 45 | 99 | 1   |
|        |            |              |            | Chagyrskaya | 94  | 20 | 96 |     |
|        |            |              |            | Vindija     | 97  | 23 | 97 |     |
| OR51E1 | Synonymous | 11:4674575   | rs3817098  | Altai       | 195 | 52 | 99 | 1   |
|        |            |              |            | Chagyrskaya | 82  | 14 | 84 |     |
|        |            |              |            | Vindija     | 86  | 16 | 87 |     |
| OR51E2 | Synonymous | 11:4703165   | rs1123991  | Ust'-Ishim  | 148 | 38 | 99 | 1   |
| OR51L1 | Synonymous | 11:5020509   | rs11035066 | Ust'-Ishim  | 562 | 48 | 99 | 1   |
| OR51L1 | Synonymous | 11:5020416   | rs2445290  | Altai       | 185 | 54 | 99 | 1   |
|        |            |              |            | Chagyrskaya | 102 | 27 | 99 |     |
|        |            |              |            | Denisova    | 140 | 36 | 99 | 1   |
|        |            |              |            | Ust'-Ishim  | 223 | 24 | 99 | 1   |
|        |            |              |            | Vindija     | 85  | 19 | 86 |     |

<sup>1</sup> also present in 2013 data

<sup>2</sup> present in 2013 Ust'-Ishim data but not 2016 Ust'-Ishim data



## **PART 2: FUNCTIONAL EXPRESSION ANALYSIS OF 2013 VCF DATA**

We generated sequence data for variant ORs using a custom bioinformatics pipeline (SI Table 3). Original BAM files from the Max Planck Institute for Evolutionary Anthropology (accessible via ftp at <http://cdna.eva.mpg.de/neandertal/altai/>) were downloaded to the Arctic Region Supercomputing Center. Files were aligned to NCBI Human Genome Build GRCh37/hg19 and split into chromosomes using bamutil.

Altai Neandertal BAM files were organized by chromosome. For Denisova and Ust'-Ishim, samtools view command was used to split BAM files into chromosomes. BAM files for all three genomes were sorted and indexed. The samtools mpileup command was used to call variants and bcftools generated VCF. The VCF file was zipped and indexed using bgzip and tabix (part of the htlib and samtools). Fastas were created using the consensus function.

**SI Table 3: Custom variant calling pipeline for data not in VCF format**

```
samtools view -b <filename_in>.bam <chromosome number> <filename_out>.bam
samtools sort -l 9 -O bam <filename_in>.bam -o <filename_out>.bam
samtools index <filename_sorted>.bam
samtools mpileup -ufl <filename_RSfasta>.fa <filename_sorted>.bam > <filename>.bcf
bcftools view -vcg <filename_in>.bcf > <filename_out>.vcf
bgzip <filename>.vcf
tabix <filename>.vcf.gz
vcftools --gzvcf <filename>.vcf.gz --chr <#> --from-bp <#> --to-bp <#> --recode --recode-INFO-all --out
<filename>
bgzip <filename>.recode.vcf
tabix <filename>.recode.vcf.gz
cat <filename_RSfasta>.fa | vcf-consensus <filename_in>.recode.vcf.gz > <filename_out>.fa
```

Three genes matched the human wild type (contained no variants, novel or shared) in all three samples tested: OR5K1, OR11A1, OR56A4)—OR11A1 did contain variants but these were outside the coding regions (five in the 3' region and one variant in the 5' region). Six genes were considered as unchanged as compared to contemporary humans: OR10A6, OR10G7, OR1C1, OR51E1, OR51E2, OR51L1. Five genes contained only shared missense mutations: OR2J3, OR5AN1, OR7C1, OR8D1, OR8K3. The remaining 16 genes contained novel missense variants (Supplemental Table9).

# SI Table 4: 2013 VCF Variants

In the 2016 VCF data, several variants were also found in the earlier 2013 data. A few variants in the 2013 Ust'-Ishim VCF data were not found in the 2016 dataset—due to the damaged DNA genotyper. Only one variant was not present in the 2013 dataset.

| Specimen   | Gene   | Position    | RS          | Quality | Raw Read Depth | Mapping Quality | Type    |
|------------|--------|-------------|-------------|---------|----------------|-----------------|---------|
| Altai      | OR6P1  | 1:158532749 | Novel       | 228     | 48             | 37              | S216A   |
| Altai      | OR6P1  | 1:158533140 | rs12080815  | 228     | 42             | 39              | SYNON   |
| Ust'-Ishim | OR6P1  | 1:158533140 | rs12080815  | 228     | 33             | 36              | SYNON   |
| Altai      | OR6P1  | 1:158533224 | rs12081915  | 228     | 62             | 37              | SYNON   |
| Ust'-Ishim | OR6P1  | 1:158533224 | rs12081915  | 228     | 41             | 37              | SYNON   |
| Denisova   | OR6P1  | 1:158533360 | Novel       | 228     | 20             | 37              | F12S    |
| Ust'-Ishim | OR10J5 | 1:159505297 | rs4656837   | 222     | 41             | 37              | SYNON   |
| Denisova   | OR10J5 | 1:159505737 | Novel       | 228     | 44             | 37              | G21R    |
| Altai      | OR2B11 | 1:247614693 | rs6695302   | 161     | 33             | 38              | V198M   |
| Denisova   | OR2B11 | 1:247614693 | rs6695302   | 228     | 23             | 37              | V198M   |
| Ust'-Ishim | OR2B11 | 1:247614693 | rs6695302   | 228     | 34             | 37              | V198M   |
| Denisova   | OR2B11 | 1:247614839 | Novel       | 228     | 37             | 37              | V149E   |
| Altai      | OR2B11 | 1:247614896 | rs11583410  | 228     | 30             | 37              | I130S   |
| Denisova   | OR2B11 | 1:247614896 | rs11583410  | 228     | 25             | 37              | I130S   |
| Ust'-Ishim | OR2B11 | 1:247614896 | rs11583410  | 228     | 20             | 37              | I130S   |
| Denisova   | OR2B11 | 1:247615024 | Novel       | 222     | 39             | 37              | SYNON   |
| Denisova   | OR2B11 | 1:247615251 | rs147030298 | 228     | 25             | 37              | S12P    |
| Ust'-Ishim | OR1C1  | 1:247921100 | rs1552812   | 228     | 36             | 37              | SYNON   |
| Altai      | OR1C1  | 1:247921352 | rs1552813   | 228     | 37             | 38              | SYNON   |
| Denisova   | OR1C1  | 1:247921352 | rs1552813   | 228     | 29             | 37              | SYNON   |
| Ust'-Ishim | OR1C1  | 1:247921352 | rs1552813   | 228     | 33             | 37              | SYNON   |
| Ust'-Ishim | OR5K1  | 3:98188365  | rs9861575   | 182     | 50             | 37              | W14C    |
| Ust'-Ishim | OR2W1  | 6:29012067  | rs35771565  | 228     | 42             | 38              | D296N   |
| Ust'-Ishim | OR2W1  | 6:29012116  | rs7341218   | 228     | 44             | 38              | SYNON   |
| Denisova   | OR2W1  | 6:29012541  | rs146659019 | 228     | 31             | 37              | P138A   |
| Denisova   | OR2J3  | 6:29080344  | rs3749977   | 228     | 27             | 37              | R226Q   |
| Altai      | OR2J3  | 6:29080349  | rs3130764   | 228     | 36             | 36              | I228V   |
| Denisova   | OR2J3  | 6:29080349  | rs3130764   | 228     | 26             | 35              | I228V   |
| Altai      | OR2J3  | 6:29080450  | rs3130765   | 228     | 44             | 31              | M261I/M |
| Denisova   | OR2J3  | 6:29080450  | rs3130765   | 228     | 35             | 26              | M261I/M |
| Altai      | OR2J2  | 6:29141772  | rs3129158   | 228     | 50             | 31              | SYNON   |
| Denisova   | OR2J2  | 6:29141772  | rs3129158   | 203     | 20             | 28              | SYNON   |
| Altai      | OR2J2  | 6:29142317  | rs41270628  | 228     | 44             | 37              | A302V   |
| Ust'-Ishim | OR2J2  | 6:29142347  | rs41270632  | 228     | 31             | 34              | K312M   |
| Altai      | OR2A25 | 7:143771536 | rs6951485   | 228     | 45             | 35              | S75N    |
| Denisova   | OR2A25 | 7:143771536 | rs6951485   | 228     | 22             | 33              | S75N    |
| Denisova   | OR2A25 | 7:143771733 | Novel       | 136     | 32             | 37              | I141V   |
| Altai      | OR2A25 | 7:143771937 | rs2961135   | 228     | 43             | 38              | A209P   |
| Denisova   | OR2A25 | 7:143771937 | rs2961135   | 228     | 25             | 37              | A209P   |
| Ust'-Ishim | OR51E1 | 11:4674369  | rs185465942 | 33      | 32             | 37              | V205I   |
| Altai      | OR51E1 | 11:4674575  | rs3817098   | 228     | 56             | 37              | SYNON   |

|            |        |              |             |     |    |    |          |
|------------|--------|--------------|-------------|-----|----|----|----------|
| Ust'-Ishim | OR51E2 | 11:4703165   | rs1123991   | 228 | 39 | 37 | SYNON    |
| Altai      | OR51L1 | 11:5020416   | rs2445290   | 228 | 60 | 38 | SYNON    |
| Denisova   | OR51L1 | 11:5020416   | rs2445290   | 228 | 36 | 37 | SYNON    |
| Ust'-Ishim | OR51L1 | 11:5020416   | rs2445290   | 156 | 24 | 37 | SYNON    |
| Ust'-Ishim | OR51L1 | 11:5020509   | rs11035066  | 222 | 52 | 36 | SYNON    |
| Ust'-Ishim | OR51L1 | 11:5020799   | rs10768448  | 222 | 45 | 36 | T196I    |
| Ust'-Ishim | OR51L1 | 11:5020832   | rs10768450  | 222 | 37 | 37 | A207V    |
| Altai      | OR5P3  | 11:7846722   | Novel       | 222 | 46 | 37 | Y266STOP |
| Altai      | OR5P3  | 11:7846752   | Novel       | 222 | 52 | 37 | SYNON    |
| Ust'-Ishim | OR5P3  | 11:7847208   | rs1482791   | 157 | 32 | 37 | SYNON    |
| Altai      | OR5P3  | 11:7847466   | rs1482792   | 222 | 55 | 39 | SYNON    |
| Denisova   | OR5P3  | 11:7847466   | rs1482792   | 228 | 44 | 37 | SYNON    |
| Ust'-Ishim | OR5P3  | 11:7847466   | rs1482792   | 228 | 54 | 36 | SYNON    |
| Ust'-Ishim | OR5P3  | 11:7847472   | rs1482793   | 222 | 56 | 36 | SYNON    |
| Altai      | OR10A6 | 11:7949350   | rs4758258   | 228 | 54 | 39 | SYNON    |
| Denisova   | OR10A6 | 11:7949350   | rs4758258   | 228 | 42 | 37 | SYNON    |
| Ust'-Ishim | OR10A6 | 11:7949350   | rs4758258   | 222 | 45 | 38 | SYNON    |
| Ust'-Ishim | OR10A6 | 11:7950024   | rs12272735  | 183 | 28 | 34 | SYNON    |
| Denisova   | OR10A6 | 11:7950075   | Novel       | 228 | 26 | 37 | SYNON    |
| Altai      | OR8K3  | 11:56086147  | rs960193    | 228 | 29 | 38 | L122R    |
| Denisova   | OR8K3  | 11:56086147  | rs960193    | 228 | 24 | 35 | L122R    |
| Ust'-Ishim | OR8K3  | 11:56086147  | rs960193    | 228 | 41 | 36 | L122R    |
| Ust'-Ishim | OR5AN1 | 11:59132798  | rs7941190   | 228 | 50 | 37 | L289F    |
| Denisova   | OR5A1  | 11:59211158  | rs140829988 | 222 | 29 | 37 | G173R    |
| Ust'-Ishim | OR5A1  | 11:59211188  | rs6591536   | 228 | 25 | 37 | D183N    |
| Ust'-Ishim | OR5A1  | 11:59211265  | rs7941591   | 228 | 28 | 37 | SYNON    |
| Altai      | OR10G4 | 11:123886307 | rs79057843  | 175 | 43 | 28 | A9V      |
| Denisova   | OR10G4 | 11:123886307 | rs79057843  | 160 | 25 | 32 | A9V      |
| Altai      | OR10G4 | 11:123886308 | rs11219407  | 228 | 43 | 28 | A9V      |
| Denisova   | OR10G4 | 11:123886308 | rs11219407  | 228 | 25 | 32 | A9V      |
| Ust'-Ishim | OR10G4 | 11:123886308 | rs11219407  | 89  | 11 | 21 | A9V      |
| Ust'-Ishim | OR10G4 | 11:123886320 | Novel       | 88  | 7  | 19 | T13A     |
| Altai      | OR10G4 | 11:123886681 | Novel       | 193 | 59 | 14 | M134V    |
| Denisova   | OR10G4 | 11:123886681 | Novel       | 44  | 33 | 10 | M134V    |
| Altai      | OR10G4 | 11:123886865 | rs4084209   | 228 | 31 | 33 | V195E    |
| Denisova   | OR10G4 | 11:123886865 | rs4084209   | 228 | 19 | 30 | V195E    |
| Ust'-Ishim | OR10G4 | 11:123886865 | rs4084209   | 228 | 21 | 28 | V195E    |
| Denisova   | OR10G4 | 11:123886948 | Novel       | 50  | 32 | 17 | S223T    |
| Denisova   | OR10G4 | 11:123886950 | Novel       | 76  | 32 | 17 | S223T    |
| Altai      | OR10G4 | 11:123886984 | rs4936880   | 221 | 50 | 34 | R235G    |
| Denisova   | OR10G4 | 11:123886984 | rs4936880   | 228 | 19 | 36 | R235G    |
| Altai      | OR10G4 | 11:123887164 | rs4936881   | 228 | 32 | 25 | K295Q    |
| Denisova   | OR10G4 | 11:123887164 | rs4936881   | 205 | 17 | 22 | K295Q    |
| Altai      | OR10G4 | 11:123887184 | rs4936882   | 228 | 28 | 33 | SYNON    |
| Denisova   | OR10G4 | 11:123887184 | rs4936882   | 228 | 23 | 34 | SYNON    |

|            |        |              |                         |     |    |    |       |
|------------|--------|--------------|-------------------------|-----|----|----|-------|
| Ust'-Ishim | OR10G4 | 11:123887184 | rs4936882               | 228 | 33 | 33 | SYNON |
| Altai      | OR10G7 | 11:123908878 | Novel                   | 222 | 55 | 37 | SYNON |
| Altai      | OR10G7 | 11:123908977 | rs188316662             | 143 | 54 | 15 | SYNON |
| Denisova   | OR10G7 | 11:123909073 | rs11219419              | 29  | 30 | 23 | SYNON |
| Ust'-Ishim | OR10G7 | 11:123909073 | rs11219419              | 228 | 25 | 27 | SYNON |
| Altai      | OR10G7 | 11:123909099 | rs59358830              | 222 | 37 | 37 | L204I |
| Ust'-Ishim | OR10G7 | 11:123909172 | rs28414940              | 74  | 43 | 8  | SYNON |
| Altai      | OR10G7 | 11:123909302 | rs513591                | 175 | 41 | 33 | T136S |
| Denisova   | OR10G7 | 11:123909302 | rs513591                | 150 | 17 | 34 | T136S |
| Altai      | OR10G7 | 11:123909311 | rs472442                | 75  | 32 | 30 | N133S |
| Denisova   | OR10G7 | 11:123909311 | rs472442                | 126 | 15 | 34 | N133S |
| Ust'-Ishim | OR10G7 | 11:123909342 | rs470242                | 200 | 12 | 27 | SYNON |
| Altai      | OR10G7 | 11:123909637 | Novel                   | 70  | 8  | 34 | SYNON |
| Ust'-Ishim | OR10G7 | 11:123909650 | rs3894199               | 111 | 32 | 17 | G20A  |
| Altai      | OR10G7 | 11:123909653 | rs4998340               | 29  | 17 | 22 | P19Q  |
| Ust'-Ishim | OR10G7 | 11:123909653 | rs4998340               | 135 | 31 | 18 | P19Q  |
| Altai      | OR10G7 | 11:123909656 | rs3894198               | 20  | 21 | 21 | A18L  |
| Denisova   | OR10G7 | 11:123909656 | rs3894198               | 10  | 7  | 19 | A18L  |
| Ust'-Ishim | OR10G7 | 11:123909656 | rs3894198               | 128 | 28 | 17 | A18L  |
| Altai      | OR10G7 | 11:123909671 | rs11827843              | 113 | 27 | 23 | T13M  |
| Denisova   | OR10G7 | 11:123909671 | rs11827843              | 47  | 16 | 20 | T13M  |
| Altai      | OR10G7 | 11:123909695 | rs3894197               | 203 | 38 | 35 | T5S   |
| Denisova   | OR10G7 | 11:123909695 | rs3894197               | 87  | 15 | 26 | T5S   |
| Ust'-Ishim | OR10G7 | 11:123909695 | rs3894197               | 228 | 24 | 29 | T5S   |
| Altai      | OR8D1  | 11:124179835 | rs4936918               | 228 | 53 | 37 | SYNON |
| Denisova   | OR8D1  | 11:124179835 | rs4936918               | 126 | 19 | 37 | SYNON |
| Altai      | OR8D1  | 11:124180082 | rs4936919               | 228 | 45 | 38 | SYNON |
| Denisova   | OR8D1  | 11:124180082 | rs4936919               | 193 | 20 | 37 | SYNON |
| Ust'-Ishim | OR8B3  | 11:124266906 | Novel                   | 221 | 64 | 26 | SYNON |
| Altai      | OR8B3  | 11:124266912 | rs28398895              | 228 | 55 | 33 | SYNON |
| Denisova   | OR8B3  | 11:124266912 | rs28398895              | 228 | 34 | 34 | SYNON |
| Ust'-Ishim | OR8B3  | 11:124266912 | rs28398895              | 220 | 61 | 27 | SYNON |
| Altai      | OR8B3  | 11:124267056 | rs144478570             | 38  | 61 | 12 | SYNON |
| Denisova   | OR8B3  | 11:124267056 | rs144478570             | 15  | 63 | 12 | SYNON |
| Denisova   | OR8B3  | 11:124267189 | rs507335                | 10  | 9  | 2  | H20R  |
| Altai      | OR4Q3  | 14:20216298  | rs12896533 <sup>1</sup> | 228 | 35 | 29 | F238L |
| Denisova   | OR4Q3  | 14:20216298  | rs12896533 <sup>1</sup> | 228 | 24 | 28 | F238L |
| Ust'-Ishim | OR4Q3  | 14:20216298  | rs12896533 <sup>1</sup> | 228 | 33 | 27 | F238L |
| Altai      | OR10G3 | 14:22038162  | rs17197261              | 228 | 51 | 38 | SYNON |
| Denisova   | OR10G3 | 14:22038287  | Novel                   | 228 | 27 | 37 | SYNON |
| Altai      | OR10G3 | 14:22038450  | rs11626669              | 228 | 35 | 39 | SYNON |
| Denisova   | OR10G3 | 14:22038450  | rs11626669              | 228 | 17 | 37 | SYNON |
| Ust'-Ishim | OR10G3 | 14:22038525  | rs11626693              | 222 | 50 | 37 | SYNON |
| Altai      | OR10G3 | 14:22038659  | rs17792778              | 228 | 37 | 39 | S73G  |
| Denisova   | OR10G3 | 14:22038659  | rs17792778              | 228 | 29 | 37 | S73G  |

|            |        |             |             |     |    |    |       |
|------------|--------|-------------|-------------|-----|----|----|-------|
| Ust'-Ishim | OR10G3 | 14:22038659 | rs17792778  | 222 | 36 | 36 | S73G  |
| Altai      | OR4E2  | 14:22133416 | rs12717305  | 228 | 40 | 38 | SYNON |
| Denisova   | OR4E2  | 14:22133416 | rs12717305  | 228 | 38 | 37 | SYNON |
| Ust'-Ishim | OR4E2  | 14:22133416 | rs12717305  | 222 | 51 | 37 | SYNON |
| Altai      | OR4E2  | 14:22133648 | rs2874103   | 228 | 57 | 39 | V118M |
| Denisova   | OR4E2  | 14:22133648 | rs2874103   | 228 | 40 | 37 | V118M |
| Ust'-Ishim | OR4E2  | 14:22133648 | rs2874103   | 222 | 47 | 37 | V118M |
| Denisova   | OR4E2  | 14:22133994 | rs200419591 | 228 | 29 | 37 | R233H |
| Altai      | OR4E2  | 14:22133997 | rs970382    | 228 | 39 | 37 | Q234R |
| Denisova   | OR4E2  | 14:22133997 | rs970382    | 228 | 31 | 37 | Q234R |
| Ust'-Ishim | OR4E2  | 14:22133997 | rs970382    | 222 | 39 | 37 | Q234R |
| Altai      | OR2C1  | 16:3405994  | rs1228348   | 228 | 62 | 38 | SYNON |
| Ust'-Ishim | OR2C1  | 16:3405994  | rs1228348   | 165 | 27 | 37 | SYNON |
| Altai      | OR2C1  | 16:3406387  | rs1218763   | 228 | 33 | 37 | C149W |
| Denisova   | OR2C1  | 16:3406387  | rs1218763   | 228 | 31 | 37 | C149W |
| Ust'-Ishim | OR2C1  | 16:3406387  | rs1218763   | 228 | 41 | 37 | C149W |
| Altai      | OR2C1  | 16:3406516  | rs11643487  | 228 | 59 | 37 | SYNON |
| Ust'-Ishim | OR2C1  | 16:3406516  | rs11643487  | 146 | 36 | 37 | SYNON |
| Denisova   | OR2C1  | 16:3406581  | Novel       | 228 | 29 | 37 | I214T |
| Altai      | OR1A1  | 17:3119008  | rs4325604   | 228 | 46 | 36 | SYNON |
| Denisova   | OR1A1  | 17:3119008  | rs4325604   | 228 | 19 | 37 | SYNON |
| Ust'-Ishim | OR1A1  | 17:3119008  | rs4325604   | 228 | 48 | 37 | SYNON |
| Denisova   | OR1A1  | 17:3119050  | Novel       | 228 | 30 | 37 | V46I  |
| Denisova   | OR1A1  | 17:3119383  | Novel       | 228 | 40 | 37 | L157F |
| Altai      | OR1A1  | 17:3119397  | rs769425    | 228 | 59 | 37 | SYNON |
| Ust'-Ishim | OR1A1  | 17:3119397  | rs769425    | 222 | 39 | 35 | SYNON |
| Ust'-Ishim | OR1A1  | 17:3119611  | rs17762735  | 222 | 40 | 37 | V233M |
| Denisova   | OR1A1  | 17:3119684  | Novel       | 228 | 27 | 37 | T257M |
| Denisova   | OR7D4  | 19:9324904  | rs546470301 | 221 | 35 | 26 | A204T |
| Denisova   | OR7D4  | 19:9324971  | Novel       | 139 | 36 | 31 | SYNON |
| Altai      | OR7C1  | 19:14910251 | rs77999564  | 228 | 66 | 37 | R233K |
| Denisova   | OR7C1  | 19:14910251 | rs77999564  | 228 | 43 | 37 | R233K |
| Altai      | OR7C1  | 19:14910321 | rs16979912  | 228 | 55 | 37 | S210P |
| Denisova   | OR7C1  | 19:14910321 | rs16979912  | 228 | 38 | 37 | S210P |
| Altai      | OR7C1  | 19:14910438 | rs10415312  | 228 | 58 | 37 | E171K |
| Denisova   | OR7C1  | 19:14910438 | rs10415312  | 228 | 36 | 37 | E171K |
| Ust'-Ishim | OR7C1  | 19:14910438 | rs10415312  | 228 | 52 | 37 | E171K |
| Altai      | OR7C1  | 19:14910573 | rs10415562  | 228 | 36 | 36 | V126I |
| Denisova   | OR7C1  | 19:14910573 | rs10415562  | 228 | 24 | 33 | V126I |
| Ust'-Ishim | OR7C1  | 19:14910573 | rs10415562  | 228 | 44 | 31 | V126I |

<sup>1</sup> rs12896533 is no longer considered valid (AKA rs61086986)

**Functional Testing.** Functional testing used the same methods presented in the main paper. The total number of genes containing novel variants was 16 (SI Table 5). Three of the 17 genes with novel variants are not reported here because they were either 1) already reported in the main paper (OR6P1, OR10J5) or 2) have been previously published (OR7D4). The novel variant in OR5P3 was not tested because it was a premature stop codon that would have terminated the protein. Several ancient genes shared all variants with modern humans and were not tested. OR10G7 was an exception due to the unique combination of shared variants across ancient samples that were not found in modern humans—while other genes had combinations of shared variants, these were limited to four or less variants, typically only one or two. OR2B11 and OR4E2 contained variants that were not tested because the assay was not responsive (OR2B11) or was minimally responsive (OR4E2). Adding all variants into the assay would not have changed that outcome. A few OR2A25 variants found in contemporary humans were not tested (SI Fig. 1).

**SI Table 5: Novel 2013 VCF Variants**

| Specimen   | Gene   | Position     | RS    | Quality | Raw Read Depth | Mapping Quality | Type     |
|------------|--------|--------------|-------|---------|----------------|-----------------|----------|
| Altai      | OR10G4 | 11:123886681 | Novel | 193     | 59             | 14              | M134V    |
| Altai      | OR10G7 | 11:123908878 | Novel | 222     | 55             | 37              | SYNON    |
| Altai      | OR10G7 | 11:123909637 | Novel | 70      | 8              | 34              | SYNON    |
| Altai      | OR5P3  | 11:7846722   | Novel | 222     | 46             | 37              | Y266STOP |
| Altai      | OR5P3  | 11:7846752   | Novel | 222     | 52             | 37              | SYNON    |
| Altai      | OR6P1  | 1:158532749  | Novel | 228     | 48             | 37              | S216A    |
| Denisova   | OR10A6 | 11:7950075   | Novel | 228     | 26             | 37              | SYNON    |
| Denisova   | OR10G3 | 14:22038287  | Novel | 228     | 27             | 37              | SYNON    |
| Denisova   | OR10G4 | 11:123886681 | Novel | 44      | 33             | 10              | M134V    |
| Denisova   | OR10G4 | 11:123886948 | Novel | 50      | 32             | 17              | S223T    |
| Denisova   | OR10G4 | 11:123886950 | Novel | 76      | 32             | 17              | S223T    |
| Denisova   | OR10J5 | 1:159505737  | Novel | 228     | 44             | 37              | G21R     |
| Denisova   | OR1A1  | 17:3119050   | Novel | 228     | 30             | 37              | V46I     |
| Denisova   | OR1A1  | 17:3119383   | Novel | 228     | 40             | 37              | L157F    |
| Denisova   | OR1A1  | 17:3119684   | Novel | 228     | 27             | 37              | T257M    |
| Denisova   | OR2A25 | 7:143771733  | Novel | 136     | 32             | 37              | I141V    |
| Denisova   | OR2B11 | 1:247614839  | Novel | 228     | 37             | 37              | V149E    |
| Denisova   | OR2B11 | 1:247615024  | Novel | 222     | 39             | 37              | SYNON    |
| Denisova   | OR2C1  | 16:3406581   | Novel | 228     | 29             | 37              | I214T    |
| Denisova   | OR6P1  | 1:158533360  | Novel | 228     | 20             | 37              | F12S     |
| Denisova   | OR7D4  | 19:9324971   | Novel | 139     | 36             | 31              | SYNON    |
| Ust'-Ishim | OR10G4 | 11:123886320 | Novel | 88      | 7              | 19              | T13A     |
| Ust'-Ishim | OR8B3  | 11:124266906 | Novel | 221     | 64             | 26              | SYNON    |



**Screening.** OR1A1, OR2B11, and OR4E2 responded in a similar way across all samples. Altai Neandertal/Ust'-Ishim OR2C1 responded to octanthiol and 2-methylpropanethiol whereas the modern human and Denisovan version appeared not to be functional. The modern human and Ust'-Ishim versions of OR2J2 responding similarly to odorants while the corresponding Denisova and Altai Neandertal ORs showed decreased responses. All but Denisova 2W1 responded to the entire set of tested odorants. Denisova 2W1 showed lower responses and, for two of the seven odorants, no response. OR2A25 was more responsive in its Altai Neandertal and Denisova versions than in the modern human/Ust'-Ishim version. OR5A1 responded to dihydrocivetone and civetone for all the considered lineages but was lower in Denisova and Ust'-Ishim than in modern humans/Altai NeandertalAI. OR10G3 responded only to vanillin; the Denisova version showed a higher response than that of modern humans and Altai Neandertal/Ust'-Ishim. For OR10G4, only the modern human and Ust'-Ishim versions were functional; Denisova and Altai Neandertal ORs did not respond to any of the tested compounds. All the versions of OR10G7 were responsive to the tested odorants, although modern humans and Denisova ORs tended to show higher responses than Ust'-Ishim and Altai Neandertal ORs.

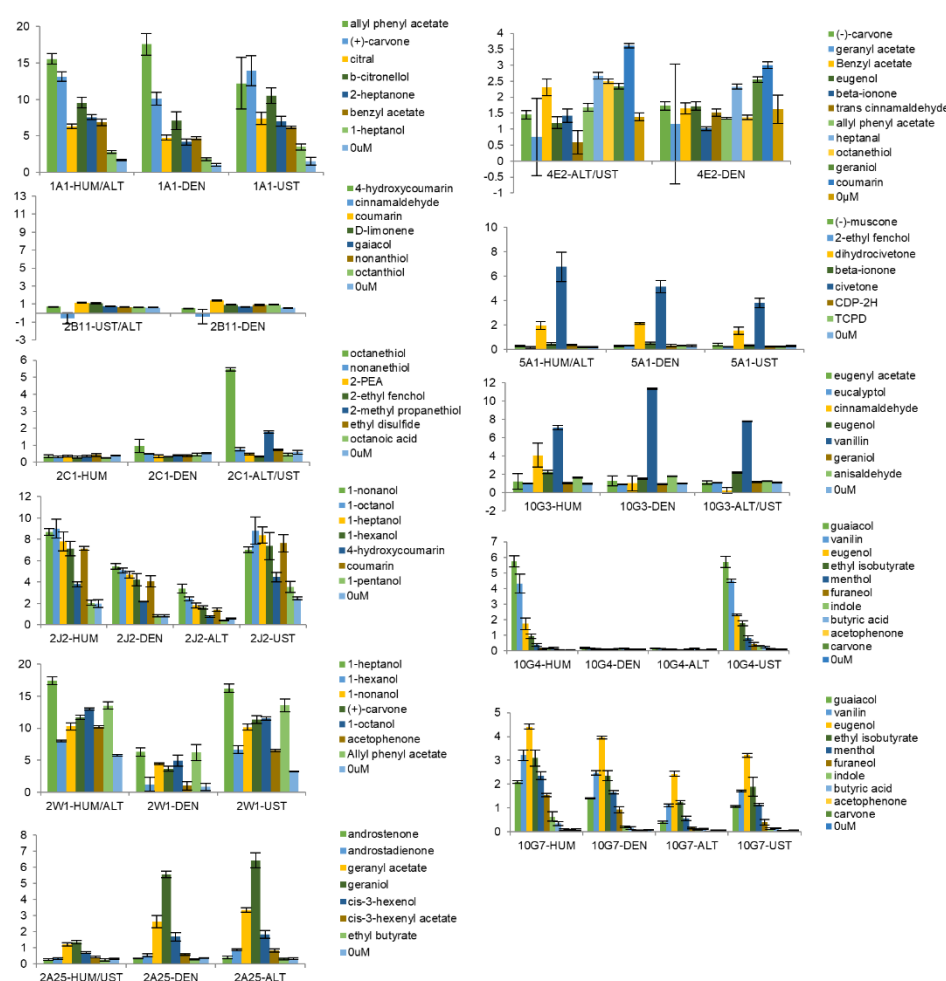

**SI Fig. 1:** Screening of variants identified with the 2013 VCF Data and their corresponding human version response against odorants at 100µM. The y-axis shows normalized luminescence recorded in the luciferase assay.



**Functional Differences.** Only data including OR positive response are shown in SI Fig 2. Linear regressions comparing contemporary humans to Altai Neandertal (SI Fig. 2a), Denisova (SI Fig. 2b), and the ancient Siberian human hunter-gatherer Ust'-Ishim (SI Fig. 2c), revealed significant differences. A global comparison to contemporary humans indicated that Altai is significantly different from humans and Denisova (SI Fig. 2d) but there were few differences in terms of patterns of response.

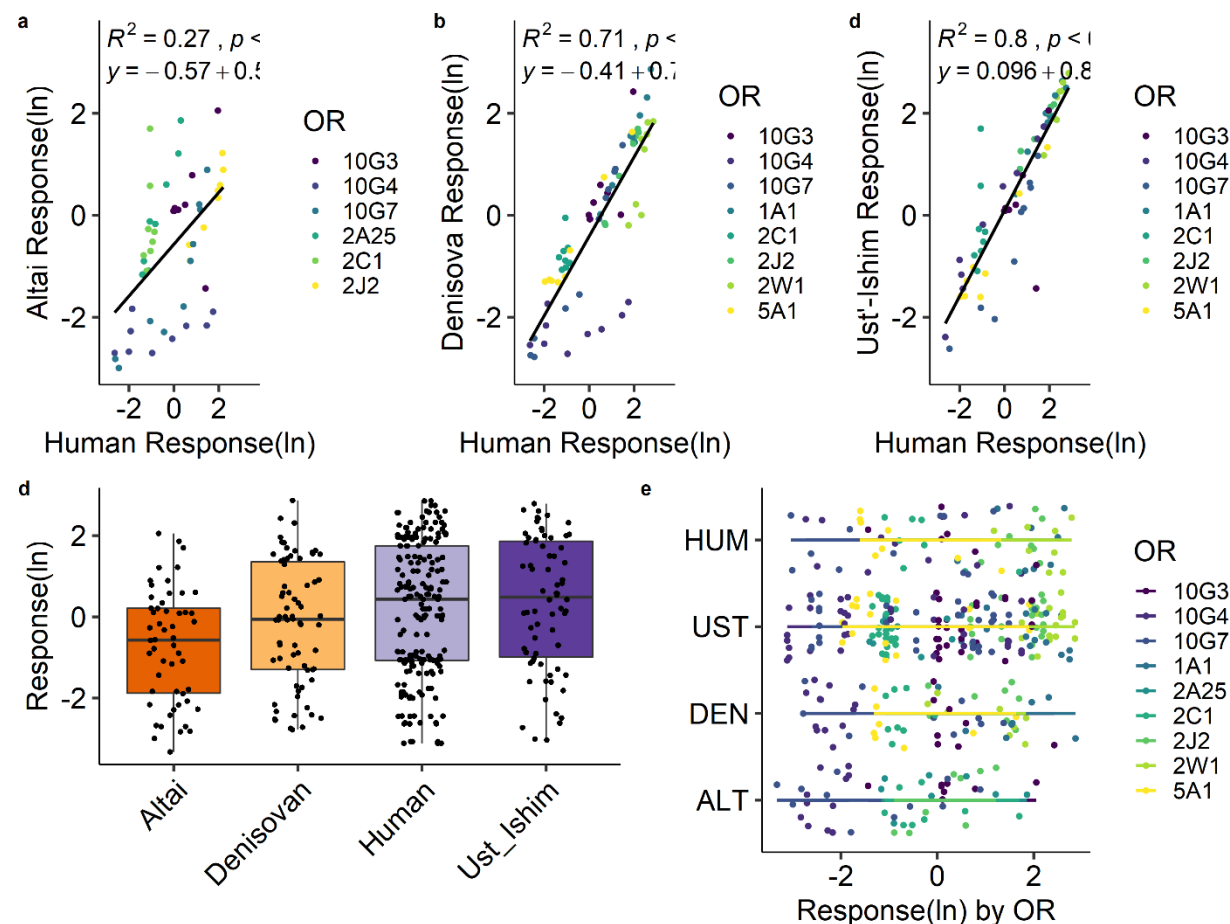

**SI Fig. 2:** Comparison of human (x-axis) and hominin (y-axis) OR responses **(a)** Altai Neandertal **(b)** Denisova **(c)** Ancient human hunter-gatherer, Ust'-Ishim, **(d)** Boxplots of natural log of OR responses across lineages (humans are divided into ancient and modern). **(e)** OR response by lineage and gene. Each OR is represented by a different color and each point represents the natural log of the response to an odorant. Dotted lines corresponds to the linear regression for the entire set of ORs responses for a given lineage. The corresponding equation and  $R^2$  values are shown on the regression plot.

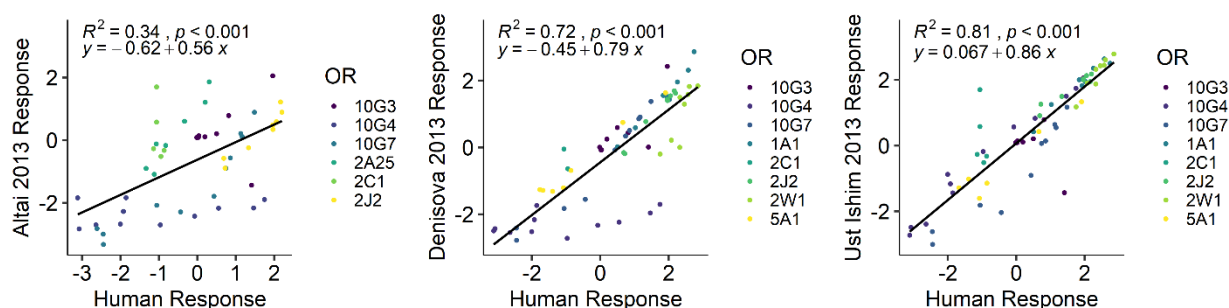

**SI Fig. 3.** Regression results for active ORs only, 2013 data.

## References

- 1 Adipietro, K. A., Mainland, J. D. & Matsunami, H. Functional evolution of mammalian odorant receptors. *PLoS Genet.* **8**, e1002821, doi:10.1371/journal.pgen.1002821 (2012).
- 2 Saito, H., Chi, Q., Zhuang, H., Matsunami, H. & Mainland, J. Odor coding by a Mammalian receptor repertoire. *Science Signaling* **2**, ra9 (2009).
- 3 Schmiedeberg, K. *et al.* Structural determinants of odorant recognition by the human olfactory receptors OR1A1 and OR1A2. *J. Struct. Biol.* **159**, 400-412, doi:10.1016/j.jsb.2007.04.013 (2007).
